1 **Structure and allosteric regulation of human IDH3 holoenzyme**

2 **Pengkai Sun<sup>1</sup>, Yan Liu<sup>2</sup>, Tengfei Ma<sup>1</sup>, and Jianping Ding<sup>1,2,3,\*</sup>**

3 <sup>1</sup> State Key Laboratory of Molecular Biology, Shanghai Institute of Biochemistry and Cell  
4 Biology, Center for Excellence in Molecular Cell Science, University of Chinese Academy of  
5 Sciences, Chinese Academy of Sciences, 320 Yueyang Road, Shanghai 200031, China

6 <sup>2</sup> School of Life Science and Technology, ShanghaiTech University, 393 Huaxia Zhong Road,  
7 Shanghai 201210, China

8 <sup>3</sup> School of Life Science, Hangzhou Institute for Advanced Study, University of Chinese  
9 Academy of Sciences, 1 Xiangshan Road, Hangzhou 310024, China

10

11 \* Correspondence: Jianping Ding (Phone: +86-21-54921619, E-mail: [jpding@sibcb.ac.cn](mailto:jpding@sibcb.ac.cn)).

12 **Running title:** Crystal structure of human NAD-IDH

13 **Keywords:** Isocitrate dehydrogenase, IDH, NAD-IDH, assembly, allosteric regulation.

14

15 **Abstract** Human NAD-dependent isocitrate dehydrogenase or IDH3 catalyzes the  
16 decarboxylation of isocitrate into  $\alpha$ -ketoglutarate in the TCA cycle. We here report the  
17 structure of the IDH3 holoenzyme, in which the  $\alpha\beta$  and  $\alpha\gamma$  heterodimers assemble the  $\alpha_2\beta\gamma$   
18 heterotetramer via their clasp domains, and two  $\alpha_2\beta\gamma$  heterotetramers assemble the  $(\alpha_2\beta\gamma)_2$   
19 heterooctamer via the  $\beta$  and  $\gamma$  subunits. The functional roles of the key residues involved in  
20 the assembly and allosteric regulation are validated by mutagenesis and kinetic studies. The  
21 allosteric site plays an important role but the pseudo allosteric site plays no role in the  
22 allosteric activation; the activation signal from the allosteric site is transmitted to the active  
23 sites of both heterodimers via the clasp domains; and the N-terminus of the  $\gamma$  subunit plays a  
24 critical role in the formation and function of the holoenzyme. These findings reveal the  
25 molecular mechanism of the assembly and allosteric regulation of human IDH3 holoenzyme.  
26

## 27 **Introduction**

28 In all aerobic organisms, the cells use the tricarboxylic acid (TCA) cycle (also called citric  
29 acid cycle or Krebs cycle) to generate ATP through oxidation of acetyl-CoA derived from  
30 carbohydrates, fats, and proteins. In addition, the TCA cycle also provides intermediates for  
31 de novo synthesis of proteins, lipids and nucleic acids (Pavlova and Thompson, 2016).  
32 Among a series of biochemical reactions in the TCA cycle, isocitrate dehydrogenases (IDHs)  
33 catalyze oxidative decarboxylation of isocitrate (ICT) into  $\alpha$ -ketoglutarate ( $\alpha$ -KG) using  
34 NAD or NADP as coenzyme. Most prokaryotes contain only NADP-dependent IDHs  
35 (NADP-IDHs) in the cytosol, which exert the catalytic function. Eukaryotes contain both  
36 NADP-IDHs and NAD-dependent IDHs (NAD-IDHs). In human and other mammalian cells,  
37 there are two NADP-IDHs and one NAD-IDH: the two NADP-IDHs are located to the  
38 cytosol and the mitochondria and are called IDH1 and IDH2, respectively, and the NAD-IDH  
39 is located to the mitochondria and is called IDH3. It is well established that IDH3 exerts the  
40 catalytic function in the TCA cycle (Al-Khallaf, 2017). Both IDH1 and IDH2 play important  
41 roles in cellular defense against oxidative damage, removal of reactive oxygen species, and  
42 synthesis of fat and cholesterol (Jo et al., 2001; Kim and Park, 2003; Koh et al., 2004; Lee et  
43 al., 2002). Aberrant functions of all three enzymes have been implicated in the pathogenesis  
44 of numerous metabolic diseases (Hartong et al., 2008; Kiefmann et al., 2017; Yoshimi et al.,  
45 2016) and malignant tumors (Dang et al., 2009; May et al., 2019; Waitkus et al., 2016; Yan et  
46 al., 2009; Zhang et al., 2015).

47 Both prokaryotic and eukaryotic NADP-IDHs exist and function as homodimers in  
48 which both subunits have catalytic activity (Hurley et al., 1991; Xu et al., 2004). These  
49 enzymes share a conserved catalytic mechanism, but have different regulatory mechanisms.  
50 The activity of *Escherichia coli* NADP-IDH is regulated through reversible phosphorylation  
51 and dephosphorylation of a strictly conserved Ser residue at the active site by the dual  
52 functional kinase/phosphatase AceK, and other bacterial NADP-IDHs might share a similar  
53 regulatory mechanism (Zheng and Jia, 2010; Zheng et al., 2012). The activity of human IDH1  
54 is regulated through substrate-binding induced conformational change of a key structure  
55 element at the active site, and other mammalian NADP-IDHs might utilize a similar  
56 regulatory mechanism (Xu et al., 2004; Yang et al., 2010).

57 Compared to NADP-IDHs, NAD-IDHs are composed of different types of subunits with  
58 distinct functions and employ more sophisticated regulatory mechanisms. *Saccharomyces*  
59 *cerevisiae* NAD-IDH is composed of a regulatory subunit IDH1 and a catalytic subunit IDH2  
60 which form the IDH1/IDH2 heterodimer as the basic functional unit, and the heterodimer is  
61 assembled into a heterotetramer and further into a heterooctamer (Lin et al., 2011; Lin and  
62 McAlister-Henn, 2003; Taylor et al., 2008). IDH2 contains the active site and IDH1 contains

63 the allosteric site, and the binding of activators citrate (CIT) and AMP to the allosteric site can  
64 cause conformational changes of the active site through the heterodimer interface, leading to  
65 the activation of the enzyme. The composition and regulation of human and other mammalian  
66 NAD-IDHs are even more complex than those of yeast NAD-IDH. Human NAD-IDH or  
67 IDH3 are composed of three types of subunits in the ratio of  $2\alpha:1\beta:1\gamma$  (Nichols et al., 1993;  
68 Nichols et al., 1995). The  $\alpha$  and  $\beta$  subunits form a heterodimer ( $\alpha\beta$ ) and the  $\alpha$  and  $\gamma$  subunits  
69 form another heterodimer ( $\alpha\gamma$ ), and the two heterodimers are assembled into the  $\alpha_2\beta\gamma$   
70 heterotetramer and further into the  $(\alpha_2\beta\gamma)_2$  heterooctamer (also called holoenzyme) (Ehrlich  
71 and Colman, 1983; Ehrlich et al., 1981).

72 Early biochemical studies of mammalian NAD-IDHs showed that the  $\alpha$  subunit is the  
73 catalytic subunit, and the  $\beta$  and  $\gamma$  subunits are the regulatory subunits (Cohen and Colman,  
74 1972; Ehrlich and Colman, 1981); and the activity of the holoenzyme is positively regulated  
75 by CIT and ADP but negatively regulated by ATP and NADH (Gabriel and Plaut, 1984a;  
76 Gabriel et al., 1985; Gabriel and Plaut, 1984b). Our biochemical studies of human IDH3  
77 confirmed some results from the previous studies but also revealed some new findings. We  
78 found that in the IDH3 holoenzyme, the  $\alpha$  subunits of both  $\alpha\beta$  and  $\alpha\gamma$  heterodimers have  
79 catalytic activity; however, only the  $\gamma$  subunit plays a regulatory role via an allosteric  
80 regulatory mechanism, while the  $\beta$  subunit plays no regulatory role but is required for the  
81 function of the holoenzyme (Ma et al., 2017b). The holoenzyme and the  $\alpha\gamma$  heterodimer are  
82 positively regulated by CIT and ADP, and negatively regulated by NADH. In addition, these  
83 enzymes can be activated by low concentrations of ATP, but inhibited by high concentrations  
84 of ATP. In contrast, the  $\alpha\beta$  heterodimer cannot be activated by CIT and ADP, and is inhibited  
85 by both NADH and ATP. Our detailed structural and biochemical studies of the  $\alpha\gamma$  and  $\alpha\beta$   
86 heterodimers revealed the underlying molecular mechanisms (Liu et al., 2018; Ma et al.,  
87 2017a; Sun et al., 2020; Sun et al., 2019). Nevertheless, so far the structure, assembly and  
88 regulatory mechanism of human IDH3 holoenzyme are still unknown. Thus, how the  $\alpha\beta$  and  
89  $\alpha\gamma$  heterodimers are assembled into the  $\alpha_2\beta\gamma$  heterotetramer and further into the  $(\alpha_2\beta\gamma)_2$   
90 heterooctamer is unclear. How the allosteric site in the  $\gamma$  subunit regulates both  $\alpha$  subunits in  
91 the  $\alpha_2\beta\gamma$  heterotetramer is also unclear. In addition, whether the regulatory mechanisms of the  
92  $\alpha\beta$  and  $\alpha\gamma$  heterodimers are applicable to the holoenzyme remains elusive.

93 In this work, we determined the crystal structure of human IDH3 holoenzyme in apo  
94 form. In the holoenzyme, the  $\alpha\beta$  and  $\alpha\gamma$  heterodimers assemble the  $\alpha_2\beta\gamma$  heterotetramer via  
95 their clasp domains, and two  $\alpha_2\beta\gamma$  heterotetramers assemble the  $(\alpha_2\beta\gamma)_2$  heterooctamer  
96 through the N-terminus of the  $\gamma$  subunit of one heterotetramer inserting into the back cleft of  
97 the  $\beta$  subunit of the other heterotetramer. We further performed mutagenesis and kinetic



98 studies to validate the functional roles of the key residues at the allosteric site, the pseudo  
99 allosteric site, the heterodimer interface, and the heterodimer-heterodimer interface, as well as  
100 the N-terminus of the  $\gamma$  subunit. Our structural and biochemical data together reveal the  
101 molecular mechanism for the assembly and allosteric regulation of human IDH3 holoenzyme.  
102

## 103 **Results**

### 104 *Preparation and biochemical analysis of human IDH3 holoenzyme*

105 The wild-type human IDH3 holoenzyme was prepared as described previously (Ma et al.,  
106 2017b). Crystallization of the wild-type IDH3 holoenzyme yielded crystals at various  
107 conditions; however, these crystals diffracted X-rays to low resolution (about 10 Å),  
108 prohibiting us from determining the crystal structure. Our previous biochemical and structural  
109 studies showed that substitution of the C-terminal region of the  $\beta$  subunit (residues 341-349)  
110 with that of the  $\alpha$  subunit (residues 330-338) produced a stable  $\alpha\beta$  mutant which exhibits  
111 similar enzymatic properties as the wild-type enzyme, and this  $\alpha\beta$  mutant yielded high quality  
112 crystals which allowed us to solve the structure of the  $\alpha\beta$  heterodimer (Sun et al., 2019). Thus,  
113 we prepared a mutant IDH3 holoenzyme containing the  $\beta$  mutant, which led to successful  
114 structure determination of the IDH3 holoenzyme.

115 Like the wild-type holoenzyme, the  $\beta$  mutant holoenzyme exists as a heterooctamer in  
116 solution with high purity and homogeneity as shown by SDS-PAGE and size exclusion  
117 chromatography (SEC) analyses (**Fig. S1**). The  $\beta$  mutant holoenzyme exhibits almost  
118 identical enzymatic properties as the wild-type holoenzyme, indicating that the substitution of  
119 the C-terminal region of the  $\beta$  subunit has no effects on the biochemical and enzymatic  
120 properties of the holoenzyme (**Fig. S2 and Table S1**). Therefore, we will not distinguish the  
121 wild-type and the  $\beta$  mutant holoenzyme hereafter.  
122

### 123 *Structure of human IDH3 holoenzyme*

124 The structure of human IDH3 holoenzyme was solved at 3.47 Å resolution (**Table 1**). The  
125 crystals of the IDH3 holoenzyme belong to space group  $I4_122$  with each asymmetric unit  
126 containing one  $\alpha_2\beta\gamma$  heterotetramer. The four polypeptide chains of the heterotetramer are  
127 largely well defined with good electron density except for a few N-terminal and/or C-terminal  
128 residues, and the  $\alpha$ ,  $\beta$ , and  $\gamma$  subunits can be distinguished unambiguously based on the  
129 differences of numerous residues with large side chains (**Fig. S3**). There are no ligands bound  
130 at the active sites, the allosteric site, and the pseudo allosteric site; thus, this structure  
131 represents the structure of the IDH3 holoenzyme in apo form. It is noteworthy that the  
132 C-terminal region of the  $\beta$  subunit is located on the structure surface and is involved in the  
133 crystal packing, which explains why the crystals of the  $\beta$  mutant IDH3 holoenzyme diffracted

134 X-rays better than the crystals of the wild-type IDH3 holoenzyme.

135

136 **Table 1. Statistics of X-ray diffraction data and structure refinement.**

137

| Structure                                                                         | IDH3 Holoenzyme          |
|-----------------------------------------------------------------------------------|--------------------------|
| Diffraction data                                                                  |                          |
| Wavelength (Å)                                                                    | 0.9792                   |
| Space group                                                                       | <i>I</i> <sub>4</sub> 22 |
| Cell parameters                                                                   |                          |
| <i>a</i> , <i>b</i> , <i>c</i> (Å)                                                | 204.57, 204.57, 237.88   |
| Resolution (Å)                                                                    | 50.0-3.47 (3.59-3.47)    |
| Observed reflections                                                              | 585,722                  |
| Unique reflections ( <i>I</i> / $\sigma$ ( <i>I</i> )>0)                          | 32,854                   |
| Average redundancy                                                                | 17.8 (17.8)              |
| Average <i>I</i> / $\sigma$ ( <i>I</i> )                                          | 35.1 (1.7)               |
| Completeness (%)                                                                  | 100.0 (100.0)            |
| R <sub>merge</sub> (%)                                                            | 10.1 (187.5)             |
| CC ½ (%)                                                                          | 99.5 (67.6)              |
| Refinement and structure model                                                    |                          |
| No. of reflections ( <i>F</i> <sub>o</sub> >0 $\sigma$ ( <i>F</i> <sub>o</sub> )) | 30,525                   |
| Working set                                                                       | 28,955                   |
| Test set                                                                          | 1,570                    |
| R <sub>work</sub> /R <sub>free</sub> factor                                       | 0.21/0.25                |
| Total atoms                                                                       | 9,851                    |
| Wilson B factor (Å <sup>2</sup> )                                                 | 51.8                     |
| Average B factor (Å <sup>2</sup> )                                                | 56.1                     |
| RMS deviations                                                                    |                          |
| Bond lengths (Å)                                                                  | 0.012                    |
| Bond angles (°)                                                                   | 1.4                      |
| Ramachandran plot (%)                                                             |                          |
| Most favored                                                                      | 85.8                     |
| Allowed                                                                           | 14.2                     |
| Disallowed                                                                        | 0.0                      |

Figure 1.

—  $\alpha$  subunit    —  $\beta$  subunit    —  $\gamma$  subunit    — N-terminal of  $\gamma$  subunit

138

120

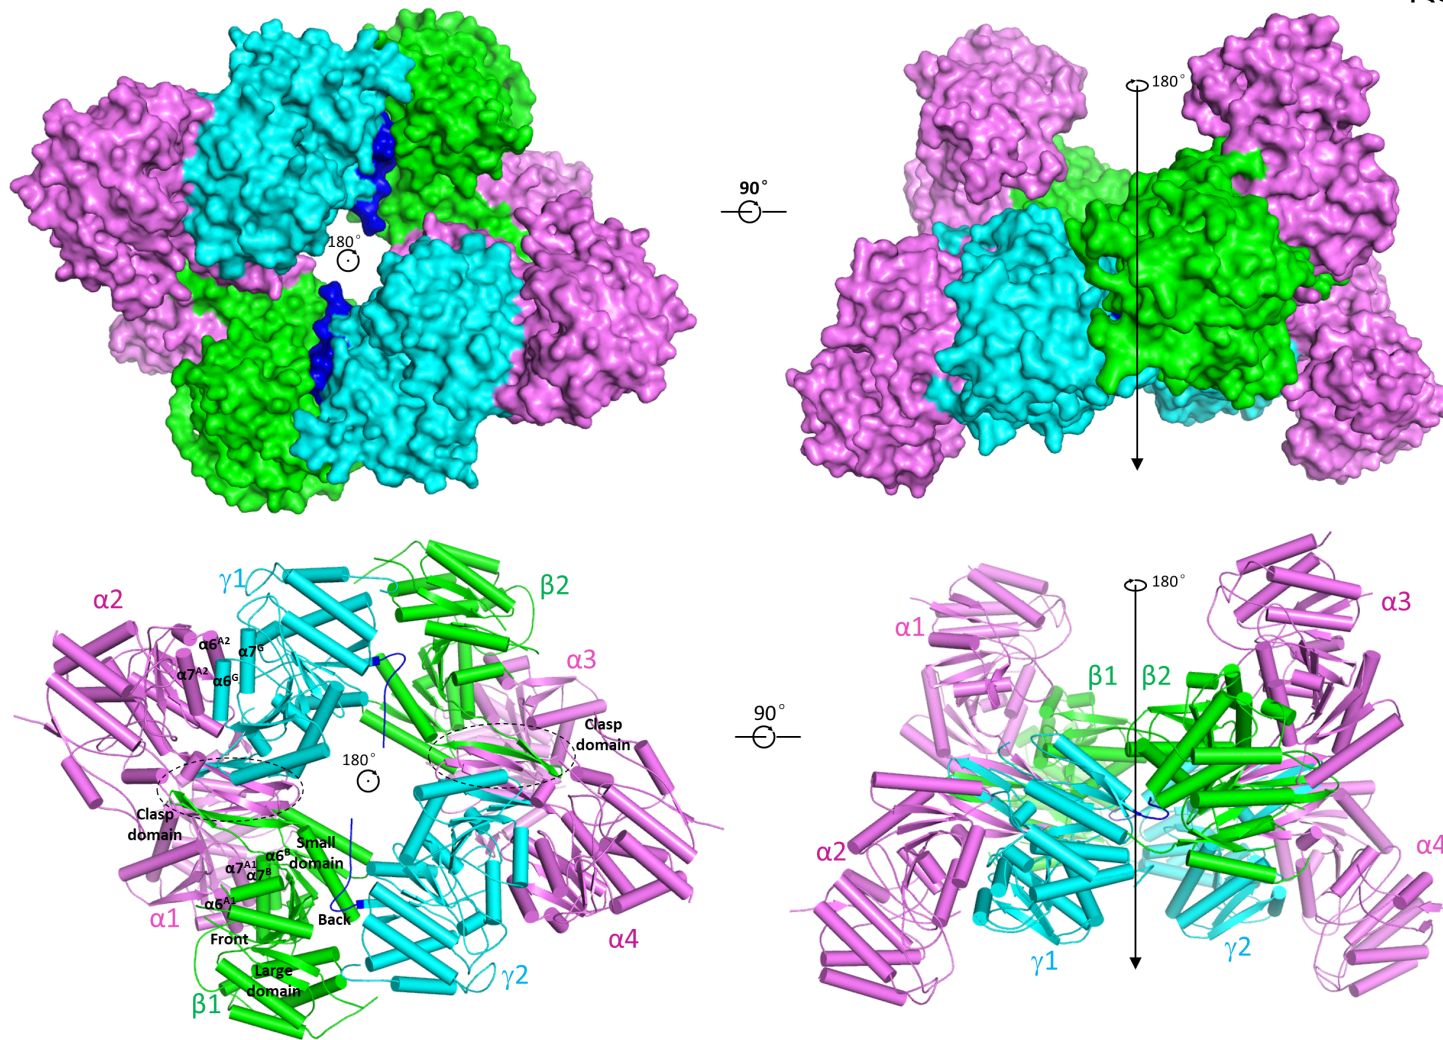

**Figure 1. Overall structure of human IDH3 holoenzyme.**

(A) Surface and (B) cartoon presentations of human IDH3 holoenzyme in two different orientations. Left: view along the crystallographic 2-fold axis of the IDH3 holoenzyme. Right: view in perpendicular to the crystallographic 2-fold axis of the IDH3 holoenzyme. The  $\alpha$ ,  $\beta$  and  $\gamma$  subunits are colored in magenta, green and cyan, respectively. The large domain, small domain and clasp domain, and the front and back clefts of the  $\beta$  subunit are indicated. The clasp domains of the  $\alpha\beta$  or  $\alpha\gamma$  heterodimers are indicated with dashed ovals, and the N-terminal regions of the  $\gamma$  subunits are colored in blue.

161 In the holoenzyme, the  $\alpha\beta$  and  $\alpha\gamma$  heterodimers assume very similar overall structures as  
162 those in the isolated forms (Ma et al., 2017a; Sun et al., 2019) (**Fig. 1**). Both heterodimers  
163 have a pseudo two-fold symmetry along the heterodimer interface. The heterodimer interface  
164 is mediated by the  $\alpha_6$  and  $\alpha_7$  helices of the small domains which form a four-helix bundle in  
165 a parallel manner, and the  $\beta_6$  and  $\beta_7$  strands of the clasp domains (the clasp  $\beta$ -strands) which  
166 form a four-stranded  $\beta$ -sheet (the clasp  $\beta$ -sheet) in an antiparallel manner. The heterodimer  
167 interface buries about 2180  $\text{\AA}^2$  and 2094  $\text{\AA}^2$  solvent accessible surface or 13.7% and 13.5% of  
168 the surface area of each subunit in the  $\alpha\beta$  and  $\alpha\gamma$  heterodimers, respectively, indicating that  
169 the heterodimer interface is very tight in both heterodimers.

170 Nevertheless, the  $\alpha\beta$  and  $\alpha\gamma$  heterodimers in the holoenzyme also exhibit some notable  
171 differences from those in the isolated forms. In particular, the  $\alpha\beta$  heterodimer assumes an  
172 open overall conformation similar to that of the isolated  $\alpha\gamma$  heterodimer rather than the  
173 compact conformation of the isolated  $\alpha\beta$  heterodimer, rendering it suitable for allosteric  
174 activation and catalytic reaction (see discussion later). In addition, the N-terminal region  
175 (residues 1-14) of the  $\gamma$  subunit is disordered in all of our previously determined  $\alpha\gamma$  structures  
176 regardless of the presence or absence of ligands; however, a large portion of the N-terminal  
177 region (residues 5-14) of the  $\alpha\gamma$  heterodimer is well defined in this structure, which plays an  
178 important role in the formation and function of the heterooctamer (see discussion later).

179

### 180 *The heterodimer-heterodimer interface in the $\alpha_2\beta\gamma$ heterotetramer*

181 In the holoenzyme, the  $\alpha_2\beta\gamma$  heterotetramer is assembled by the  $\alpha\beta$  and  $\alpha\gamma$  heterodimers via  
182 their clasp domains (**Figs. 1 and 2A**). There is a pseudo two-fold symmetry along the  
183 heterodimer-heterodimer interface, which is about  $25^\circ$  off the coplane axis of the  $\alpha\beta$  or  
184  $\alpha\gamma$  heterodimer. In other words, the coplane axes of the  $\alpha\beta$  and  $\alpha\gamma$  heterodimers make a  $50^\circ$   
185 angle. Thus, the heterotetramer has a distorted tetrahedron architecture with the two  $\alpha$   
186 subunits occupying two vertices on the same side and the  $\beta$  and  $\gamma$  subunits two vertices on the  
187 other side (**Fig. 2A**). The heterodimer-heterodimer interface buries about 804  $\text{\AA}^2$  solvent  
188 accessible surface or 3.0% of the surface area of each heterodimer. At the interface, the clasp  
189  $\beta$ -sheets of the two heterodimers interact with each other to form a  $\beta$ -barrel in a reciprocal  
190 manner such that the clasp  $\beta$ -strands of the  $\beta$  subunit stack antiparallely onto those of the  $\alpha$   
191 subunit of the  $\alpha\gamma$  heterodimer, and the clasp  $\beta$ -strands of the  $\gamma$  subunit stack antiparallely  
192 onto those of the  $\alpha$  subunit of the  $\alpha\beta$  heterodimer (**Fig. 2A**). The interface consists of  
193 twenty-two hydrophobic residues and two Ser residues from the four clasp domains which  
194 form extensive hydrophobic interactions (**Fig. 2B**). In addition, there are eight hydrophilic  
195 residues which form two layers of hydrogen-bonding interactions to separate the hydrophobic

196 interactions (**Figs. 2B and 2C**). Specifically, the side chains of His131<sup>A1</sup> and Gln139<sup>A1</sup> of the  
197  $\alpha$  subunit in the  $\alpha\beta$  heterodimer and His131<sup>A2</sup> and Gln139<sup>A2</sup> of the  $\alpha$  subunit in the  $\alpha\gamma$   
198 heterodimer form one network of hydrogen bonds, and the side chains of Gln150<sup>B</sup> and  
199 His142<sup>B</sup> of the  $\beta$  subunit and Gln148<sup>G</sup> and His140<sup>G</sup> of the  $\gamma$  subunit form another network of  
200 hydrogen bonds (residues and structure elements of the  $\alpha$  and  $\beta$  subunits of the  $\alpha\beta$   
201 heterodimer and the  $\alpha$  and  $\gamma$  subunits of the  $\alpha\gamma$  heterodimer are superscripted by “A1” and  
202 “B”, and A2” and “G”, respectively).

203

#### 204 *The heterotetramer-heterotetramer interface in the $(\alpha_2\beta\gamma)_2$ heterooctamer*

205 In the holoenzyme, the  $(\alpha_2\beta\gamma)_2$  heterooctamer is assembled by two  $\alpha_2\beta\gamma$  heterotetramers  
206 related by a crystallographic two-fold symmetry via the  $\beta$  and  $\gamma$  subunits (**Fig. 1**). Thus, the  
207 heterooctamer has a distorted tetrahedron architecture, in which the two  $\beta$  and two  $\gamma$  subunits  
208 are arranged alternately to form the inner core, and the four  $\alpha$  subunits are positioned on the  
209 periphery. The heterotetramer-heterotetramer interface buries about 2248 Å<sup>2</sup> solvent  
210 accessible surface or 4.3% of the surface area of the heterotetramer. At the interface, the  
211 N-terminal region of the  $\gamma$  subunit of one heterotetramer intrudes into a shallow cleft between  
212 the small and large domains of the  $\beta$  subunit on the back of the pseudo allosteric site  
213 (designated as the “back cleft”) of the other heterotetramer (**Fig. 2D**). In particular, residues  
214 10-14 (AKYGG) of the  $\gamma$  subunit make a number of hydrogen-bonding interactions with  
215 several residues of the back cleft of the  $\beta$  subunit, which form a major part of the  
216 heterotetramer-heterotetramer interface (**Fig. 2E**). Specifically, the main-chain carbonyl of  
217 Pro8<sup>G</sup> forms a hydrogen bond with the side chain of Lys165<sup>B</sup>; the side chain of Tyr12<sup>G</sup> forms  
218 a hydrogen bond with the side chain of Asp169<sup>B</sup> and additionally a  $\pi$ - $\pi$  stacking interaction  
219 with the side chain of Phe166<sup>B</sup>; the main-chain amine and carbonyl of Gly13<sup>G</sup> form a  
220 hydrogen bond each with the main-chain carbonyl of Ala264<sup>B</sup> and the side chain of His301<sup>B</sup>,  
221 respectively; the main-chain amine of Gly14<sup>G</sup> forms a hydrogen bond with the main-chain  
222 carbonyl of Glu265<sup>B</sup>. In addition to the N-terminal region, the  $\alpha_2$  helix of the  $\gamma$  subunit also  
223 makes interactions with the  $\alpha_4$  and  $\alpha_5$  helices of the  $\beta$  subunit, which form a minor part of  
224 the heterotetramer-heterotetramer interface. In this region, the main-chain carbonyl and side  
225 chain of Arg70<sup>G</sup> on the  $\alpha_2^G$  helix form a hydrogen bond each with the side chain of Lys165<sup>B</sup>  
226 and the main-chain carbonyl of Leu205<sup>B</sup>, respectively. Sequence alignments showed that  
227 although the N-terminal region of the  $\gamma$  subunit is different from that of the  $\alpha$  and  $\beta$  subunits,  
228 residues 10-14 (AKYGG) are strictly conserved in other mammalian NAD-IDHs and highly  
229 conserved in the regulatory subunit IDH1 of yeast NAD-IDH (Liu et al., 2018; Sun et al.,  
230 2019), suggesting that the N-terminal region of the regulatory subunit in other eukaryotic  
231 NAD-IDHs might play a similar role in the assembly of the holoenzyme.



Figure 2.

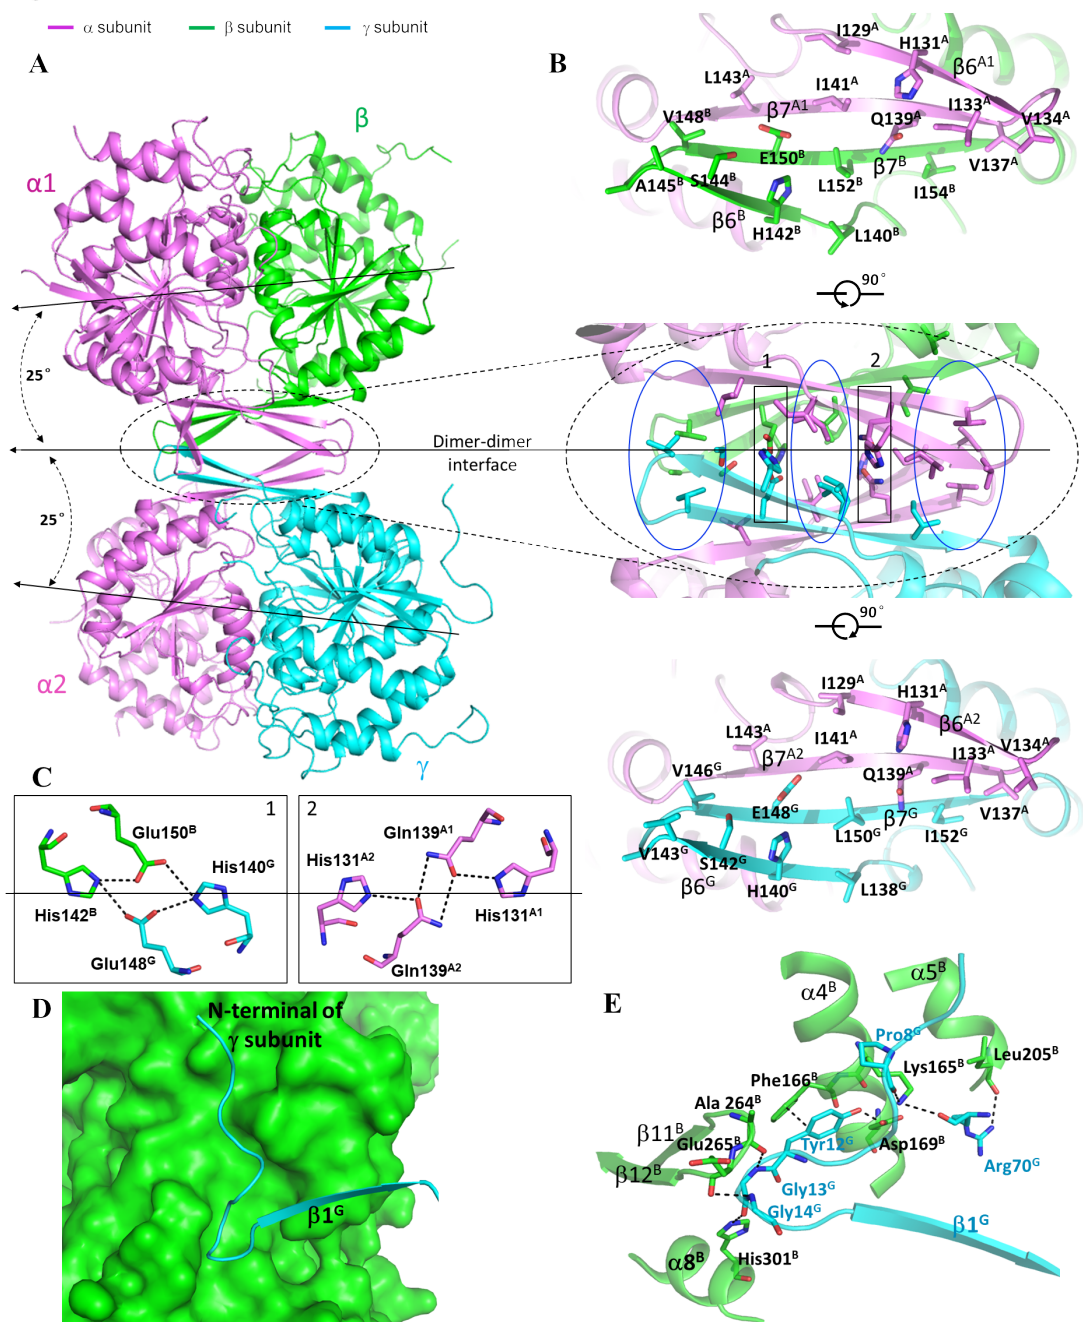

232

233 **Figure 2. Interactions at the heterodimer-heterodimer and the heterotetramer-heterotetramer**  
 234 **interfaces.**

235 (A) The  $\alpha_2\beta\gamma$  heterotetramer is assembled by the  $\alpha\beta$  and  $\alpha\gamma$  heterodimers via their clasp domains. The  
 236 color coding of the  $\alpha$ ,  $\beta$  and  $\gamma$  subunits is the same as in Figure 1. The pseudo 2-fold axis along the  
 237 heterodimer-heterodimer interface, and the coplane axes of the  $\alpha\beta$  and  $\alpha\gamma$  heterodimers are indicated.

238 (B) Structure of the heterodimer-heterodimer interface. Middle panel: interactions at the interface  
 239 consist of largely hydrophobic residues (marked by blue ovals) and a few hydrophilic residues (marked  
 240 by black rectangles). Upper panel: interactions between the  $\alpha$  and  $\beta$  subunits at the interface. Lower  
 241 panel: interactions between the  $\alpha$  and  $\gamma$  subunits at the interface. (C) Hydrogen-bonding interactions

242 between the  $\beta$  and  $\gamma$  subunits (left panel) and between the two  $\alpha$  subunits (right panel). **(D)** A surface  
243 diagram showing that the N-terminal region of the  $\gamma$  subunit (in blue ribbon) of one heterotetramer  
244 intrudes into the back cleft of the  $\beta$  subunit (in green surface) of the other heterotetramer. **(E)**  
245 Interactions between the N-terminal of the  $\gamma$  subunit and the back cleft of the  $\beta$  subunit. The  
246 hydrogen-bonding interactions are indicated with dashed lines.

247

### 248 *The apo IDH3 holoenzyme assumes an inactive conformation*

249 Structural comparison shows that the  $\alpha\gamma$  heterodimer in the apo IDH3 holoenzyme adopts an  
250 inactive overall conformation similar to that in the isolated  $\alpha^{\text{Mg}}\gamma$  heterodimer. Specifically, the  
251 key residues at the active site (Tyr126<sup>A2</sup>) and the allosteric site (Tyr135<sup>G</sup>) assume similar  
252 conformations as those in the inactive  $\alpha^{\text{Mg}}\gamma$  structure rather than those in the active  
253  $\alpha^{\text{Mg}}\gamma^{\text{Mg+CIT+ADP}}$  structure; the N-terminal regions of both  $\alpha 7^{\text{A2}}$  and  $\alpha 7^{\text{G}}$  helices at the  
254 heterodimer interface assume the inactive loop conformations; and additionally, the allosteric  
255 site is in proper conformation to bind the activators **(Fig. 3A)**. Intriguingly, the  $\alpha\beta$   
256 heterodimer in the apo IDH3 holoenzyme exhibits some conformational differences compared  
257 with the isolated  $\alpha^{\text{Ca}}\beta$  heterodimer. Structural analysis reveals that the insertion of the  
258 N-terminus of the  $\gamma$  subunit into the back cleft of the  $\beta$  subunit pushes the large domain of the  
259  $\beta$  subunit to rotate away from the  $\alpha$  subunit (the structure elements moving away from the  $\alpha$   
260 subunit by about 1.5-3 Å) **(Fig. 3B)**. Consequently, the  $\alpha\beta$  heterodimer assumes an open  
261 overall conformation similar to that of the  $\alpha^{\text{Mg}}\gamma$  structure rather than the compact  
262 conformation of the isolated  $\alpha^{\text{Ca}}\beta$  structure. In particular, the key residues at the active site  
263 (Tyr126<sup>A1</sup>) and the pseudo allosteric site (Tyr137<sup>B</sup>) assume inactive conformations similar to  
264 those in the  $\alpha^{\text{Mg}}\gamma$  structure **(Fig. 3C)**. In addition, the N-terminal region of helix  $\alpha 7^{\text{A1}}$  of the  $\alpha$   
265 subunit at the heterodimer interface assumes a loop conformation; however, the N-terminal  
266 region of helix  $\alpha 7^{\text{B}}$  of the  $\beta$  subunit assumes a helix conformation with unknown reason.

267 At the pseudo allosteric site, the  $\beta 3^{\text{B}}-\alpha 3^{\text{B}}$  loop is disordered, similar to that in the isolated  
268  $\alpha^{\text{Ca}}\beta$  structure. On the other hand, the  $\beta 12^{\text{B}}-\alpha 8^{\text{B}}$  loop exhibits some conformational difference  
269 from that in the isolated  $\alpha^{\text{Ca}}\beta$  structure **(Fig. 3D)**. Nevertheless, the N-terminal region of the  
270  $\beta 12^{\text{B}}-\alpha 8^{\text{B}}$  loop maintains interactions with the  $\alpha 6^{\text{A1}}$  and  $\alpha 7^{\text{B}}$  helices at the heterodimer  
271 interface and still occupies the ADP-binding site in the  $\alpha^{\text{Mg}}\gamma^{\text{Mg+CIT+ADP}}$  structure, prohibiting  
272 the ADP binding. These results together indicate that the formation of the heterooctamer  
273 renders the  $\alpha\beta$  heterodimer to adopt an overall conformation similar to that of the  $\alpha\gamma$   
274 heterodimer; however, the pseudo allosteric site remains incapable of binding the activators  
275 and thus the  $\beta$  subunit still has no regulatory function. This explains why the  $\alpha\beta$  heterodimer  
276 in the holoenzyme can be allosterically activated and has normal enzymatic activity but  
277 cannot bind the activators. These results also demonstrate that the structure characteristics and

278 the regulatory mechanisms of the  $\alpha\beta$  and  $\alpha\gamma$  heterodimers uncovered from the structure and  
 279 biochemical studies of the isolated heterodimers are largely applicable to the holoenzyme.

Figure 3.

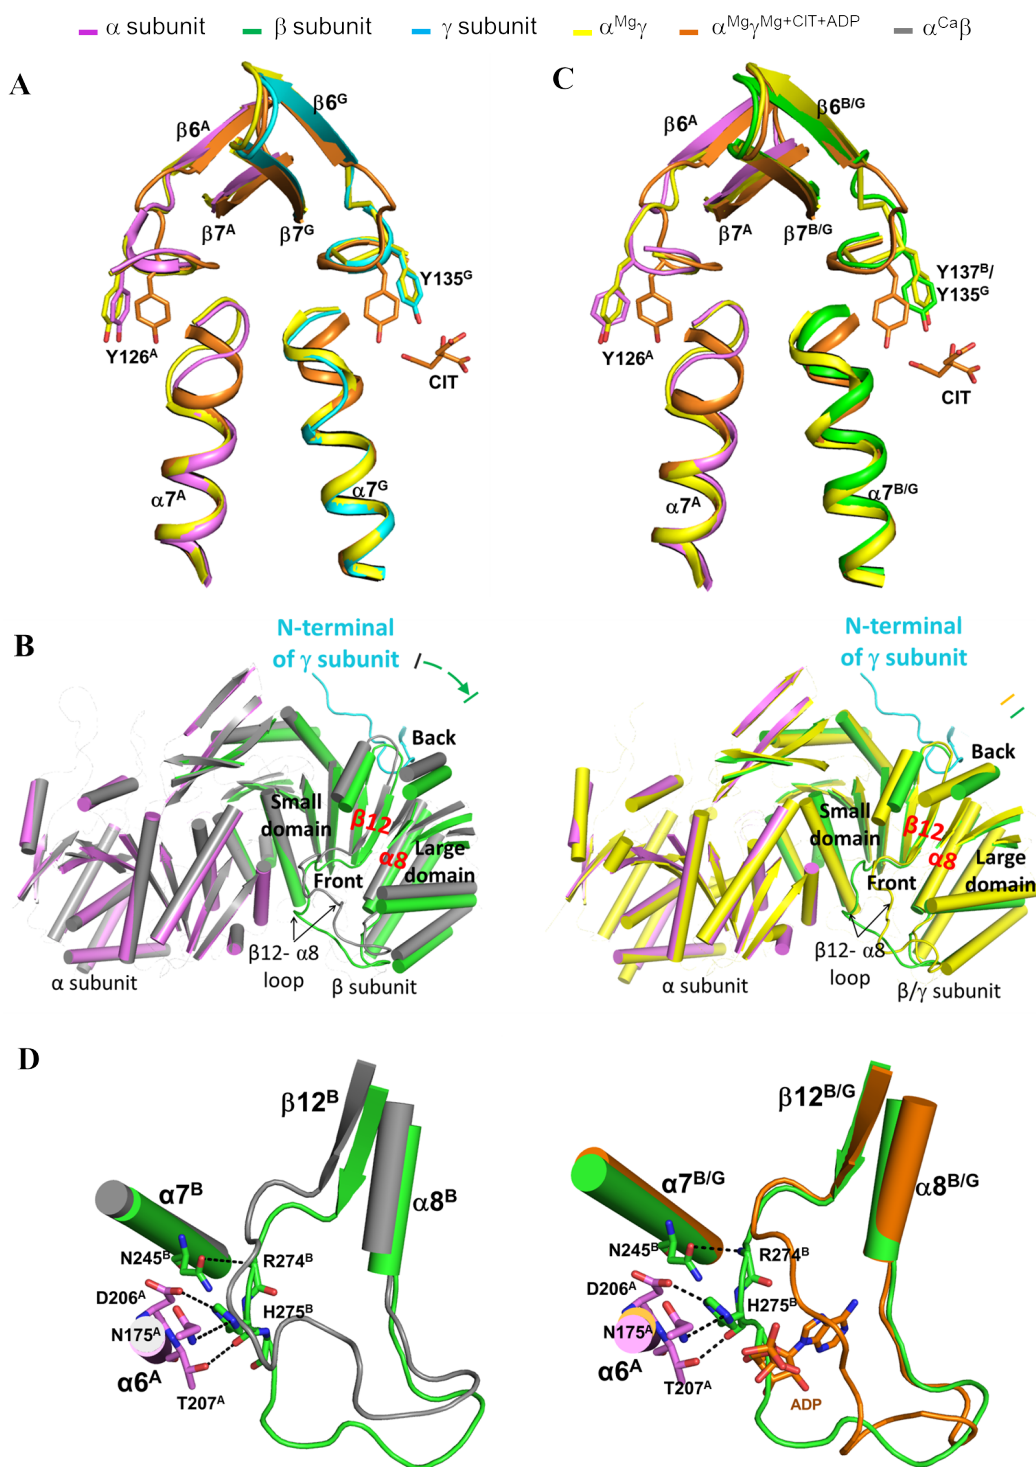

280

281 **Figure 3. Structural comparisons of the  $\alpha\beta$  and  $\alpha\gamma$  heterodimers in the apo holoenzyme and in**  
 282 **the isolated forms.**

283 (A) Comparison of the  $\alpha\gamma$  heterodimer in the holoenzyme and in the isolated forms. The color coding  
 284 of the subunits and structures is shown above. The key residues at the active site (Tyr126<sup>A</sup>) and the



285 allosteric site (Tyr135<sup>G</sup>) assume similar conformations as those in the inactive  $\alpha^{\text{Mg}}\gamma$  structure rather  
286 than those in the active  $\alpha^{\text{Mg}}\gamma^{\text{Mg+CIT+ADP}}$  structure. **(B)** Comparison of the overall conformation of the  $\alpha\beta$   
287 heterodimer in the holoenzyme with that of the isolated  $\alpha^{\text{Ca}}\beta$  heterodimer (colored in gray, left panel)  
288 and  $\alpha^{\text{Mg}}\gamma$  heterodimer (colored in yellow, right panel). The  $\alpha\beta$  heterodimer assumes an open overall  
289 conformation similar to that of the isolated  $\alpha^{\text{Mg}}\gamma$  heterodimer rather than the compact conformation of  
290 the isolated  $\alpha^{\text{Ca}}\beta$  heterodimer. For clarity, only the  $\alpha$  helices and  $\beta$  strands are shown, and the loops are  
291 omitted except the  $\beta_{12}$ - $\beta_{18}$  loops of the  $\beta$  and  $\gamma$  subunits. The N-terminal of the  $\gamma$  subunit from another  
292 heterotetramer is also shown. **(C)** Comparison of the  $\alpha\beta$  heterodimer in the holoenzyme with the  
293 isolated  $\alpha^{\text{Mg}}\gamma$  heterodimer and  $\alpha^{\text{Mg}}\gamma^{\text{Mg+CIT+ADP}}$  heterodimer. The key residues at the active site (Tyr126<sup>A</sup>)  
294 and the allosteric site (Tyr137<sup>B</sup>) assume similar conformations as those in the inactive  $\alpha^{\text{Mg}}\gamma$  structure  
295 rather than those in the active  $\alpha^{\text{Mg}}\gamma^{\text{Mg+CIT+ADP}}$  structure. **(D)** The  $\beta_{12}$ - $\beta_{18}$  loop of the  $\beta$  subunit in the  
296 holoenzyme exhibits some conformational differences from that in the isolated  $\alpha^{\text{Ca}}\beta$  heterodimer but  
297 still occupies the ADP-binding site in the  $\alpha^{\text{Mg}}\gamma^{\text{Mg+CIT+ADP}}$  structure. The hydrogen-bonding interactions  
298 of the  $\beta_{12}$ - $\beta_{18}$  loop with the  $\alpha_{7}^{\text{B}}$  and  $\alpha_{6}^{\text{A}}$  helices are indicated with dashed lines.

299

300 ***The clasp domains of the  $\alpha\beta$  and  $\alpha\gamma$  heterodimers play a critical role in the assembly and***  
301 ***allosteric regulation of the  $\alpha_2\beta\gamma$  heterotetramer***

302 Our previous biochemical studies showed that the holoenzyme has notably higher activity  
303 than the sum of the isolated  $\alpha\beta$  and  $\alpha\gamma$  heterodimers in both absence and presence of the  
304 activators, suggesting that in the holoenzyme, both  $\alpha\beta$  and  $\alpha\gamma$  heterodimers are allosterically  
305 activated and exert catalytic function (Ma et al., 2017b). Our biochemical and structural  
306 studies of the  $\alpha\gamma$  heterodimer showed that residues Arg97<sup>G</sup>, Tyr135<sup>G</sup>, and Arg272<sup>G</sup> at the  
307 allosteric site, and residues Lys151<sup>G</sup> and Lys142<sup>A2</sup> at the heterodimer interface play important  
308 roles in the allosteric activation (Ma et al., 2017a). Structural analysis of the apo IDH3  
309 holoenzyme shows that residues His131<sup>A1</sup>, Gln139<sup>A1</sup>, His131<sup>A2</sup>, Gln139<sup>A2</sup>, His142<sup>B</sup>, Glu150<sup>B</sup>,  
310 His140<sup>G</sup>, and Glu148<sup>G</sup> of the clasp domains play an important role in the assembly of the  
311  $\alpha_2\beta\gamma$  heterotetramer. To investigate the functional roles of these residues in the holoenzyme,  
312 we prepared a series of mutant holoenzymes containing mutations of the key residues at the  
313 allosteric site ( $\gamma_{\text{R97A}}$ ,  $\gamma_{\text{Y135A}}$ , and  $\gamma_{\text{R272A}}$ ), the pseudo allosteric site ( $\beta_{\text{R99A}}$ ,  $\beta_{\text{Y137A}}$ , and  $\beta_{\text{R274A}}$ ,  
314 corresponding to  $\gamma_{\text{R97A}}$ ,  $\gamma_{\text{Y135A}}$ , and  $\gamma_{\text{R272A}}$ ), the heterodimer interfaces ( $\alpha_{1\text{K142A}}$ ,  $\alpha_{2\text{K142A}}$ ,  
315  $\alpha_{1\text{K142A}}\alpha_{2\text{K142A}}$ ,  $\beta_{\text{K153A}}$ , and  $\gamma_{\text{K151A}}$ ), and the heterodimer-heterodimer interface ( $\alpha_{1\text{Q139A}}$ ,  
316  $\alpha_{2\text{Q139A}}$ ,  $\alpha_{1\text{Q139A}}\alpha_{2\text{Q139A}}$ ,  $\beta_{\text{E150A}}$ , and  $\gamma_{\text{E148A}}$ ), and measured their kinetic parameters in the  
317 absence or presence of CIT and ADP to examine the effects of the mutations on the activity  
318 and allosteric activation of the holoenzyme. The mutant  $\alpha\beta$  and  $\alpha\gamma$  heterodimers containing  
319 mutations  $\alpha_{1\text{H131A}}$ ,  $\alpha_{2\text{H131A}}$ ,  $\beta_{\text{H142A}}$ , and  $\gamma_{\text{H140A}}$  could not be expressed for unknown reason(s)  
320 and thus the mutant holoenzymes containing these mutations could not be obtained.

321 The wild-type holoenzyme exhibits a  $V_{\max}$  of 28.6  $\mu\text{mol}/\text{mg}/\text{min}$  and a  $S_{0.5,\text{ICT}}$  of 3.54  
322 mM in the absence of the activators and a  $V_{\max}$  of 30.6  $\mu\text{mol}/\text{mg}/\text{min}$  and a  $S_{0.5,\text{ICT}}$  of 0.43 mM  
323 in the presence of the activators, and displays a significant activation effect (8.2 folds)  
324 (defined as the ratio of the  $S_{0.5,\text{ICT}}$  in the presence and absence of the activators) (**Table 2 and**  
325 **Fig. 4**). Compared to the wild-type holoenzyme, the mutant holoenzymes containing  
326 mutations of the key residues at the allosteric site ( $\gamma_{\text{R97A}}$ ,  $\gamma_{\text{Y135A}}$ , and  $\gamma_{\text{R272A}}$ ) exhibit comparable  
327  $V_{\max}$  (<1.2 folds) and  $S_{0.5,\text{ICT}}$  (<1.6 folds) in the absence of the activators, and display weak or  
328 no activation effects (0.9-2.7 folds), indicating that the mutations at the allosteric site have  
329 significant impacts on the activation of the holoenzyme (**Table 2 and Fig. 4**). On the other  
330 hand, the mutant holoenzymes containing mutations of the key residues at the pseudo  
331 allosteric site ( $\beta_{\text{R99A}}$ ,  $\beta_{\text{Y137A}}$ , and  $\beta_{\text{R274A}}$ ) also exhibit comparable  $V_{\max}$  (<1.3 folds) but slightly  
332 decreased  $S_{0.5,\text{ICT}}$  (<3.9 folds) in the absence of the activators, and display moderate activation  
333 effects (3.1-4.3 folds), indicating that the mutations at the pseudo allosteric site have  
334 insignificant impacts on the activation and function of the holoenzyme (**Table 2 and Fig. 4**).

335 The mutant holoenzymes containing mutations of the key residues at the heterodimer  
336 interfaces ( $\alpha_{1\text{K142A}}$ ,  $\alpha_{2\text{K142A}}$ ,  $\alpha_{1\text{K142A}}\alpha_{2\text{K142A}}$ ,  $\beta_{\text{K153A}}$ , and  $\gamma_{\text{K151A}}$ ) exhibit significantly  
337 decreased  $V_{\max}$  (3.1-15.1 folds) and a varied  $S_{0.5}$  (0.4-3.2 folds) in the absence of the  
338 activators, and display moderate or no activation effects (0.7-3.3 folds) (**Table 2 and Fig. 4**).  
339 In particular, the mutant holoenzyme containing the  $\gamma_{\text{K151A}}$  mutation completely disrupts the  
340 activation. These results indicate that the mutations at the heterodimer interface significantly  
341 impair the communication from the allosteric site to the active sites of both  $\alpha$  subunits and  
342 thus have severe impacts on the activation and function of the holoenzyme. For the key  
343 residues at the heterodimer-heterodimer interface, the mutant holoenzymes containing  
344 mutations  $\beta_{\text{E150A}}$  and  $\gamma_{\text{E148A}}$  exhibit slightly decreased  $V_{\max}$  (about 2 folds) and  $S_{0.5}$  (about 2.7  
345 folds) in the absence of the activators, and display substantial activation effects (5.2-5.6 folds),  
346 indicating that these mutations have minor impacts on the activation and function of the  
347 holoenzyme (**Table 2 and Fig. 4**). Intriguingly, the mutant holoenzymes containing mutations  
348  $\alpha_{1\text{Q139A}}$ ,  $\alpha_{2\text{Q139A}}$ , and  $\alpha_{1\text{Q139A}}\alpha_{2\text{Q139A}}$  display slightly higher  $V_{\max}$  (about 1.2-1.6 folds) but  
349 significantly decreased  $S_{0.5,\text{ICT}}$  (6.8-14.8 folds) in the absence of the activators, and display  
350 weak activation effects (<1.7 folds), indicating that these mutants are constitutively active  
351 regardless the absence or presence of the activators (**Table 2 and Fig. 4**).

352 Taken together, the biochemical data demonstrate that the allosteric site plays a critical  
353 role and the pseudo allosteric site has no regulatory role in the allosteric activation of the  
354 holoenzyme; the heterodimer interfaces play a vital role in the allosteric regulation and  
355 function of the holoenzyme; and the heterodimer-heterodimer interface plays an important  
356 role in the assembly and allosteric regulation of the  $\alpha_2\beta\gamma$  heterotetramer and the holoenzyme.

357

358 **Table 2.** Activities and kinetic parameters of the wild-type and mutant IDH3 holoenzymes.

| Enzyme                                                                                       | $V_{\max}$ (mmol/mg/min)<br>-activators/+activators | $S_{0.5,ICT}$ (mM)<br>-activators/+activators | Activation<br>effect <sup>a</sup> (fold) |
|----------------------------------------------------------------------------------------------|-----------------------------------------------------|-----------------------------------------------|------------------------------------------|
| $\alpha\beta$                                                                                | 2.72±0.14/2.80±0.23                                 | 3.65±0.39/3.63±0.62                           | 1.0                                      |
| $\alpha\gamma$                                                                               | 9.62±0.23/16.1±1.1                                  | 5.42±0.71/0.26±0.07                           | 20.8                                     |
| $\alpha\beta\alpha\gamma$                                                                    | 28.6±0.3/30.6±1.0                                   | 3.54±0.18/0.43±0.03                           | 8.2                                      |
| <b>Pseudo allosteric site</b>                                                                |                                                     |                                               |                                          |
| $\alpha\beta_{R99A}\alpha\gamma$                                                             | 24.9±0.8/27.7±1.5                                   | 1.45±0.07/0.34±0.05                           | 4.3                                      |
| $\alpha\beta_{Y137A}\alpha\gamma$                                                            | 30.2±1.0/39.4±3.8                                   | 1.50±0.09 /0.49±0.05                          | 3.1                                      |
| $\alpha\beta_{R274A}\alpha\gamma$                                                            | 35.9±1.2/38.0±2.4                                   | 0.91±0.01/0.23±0.06                           | 4.0                                      |
| <b>Allosteric site</b>                                                                       |                                                     |                                               |                                          |
| $\alpha\beta\alpha\gamma_{R97A}$                                                             | 33.2±0.8/34.4±2.1                                   | 3.46±0.29/1.20±0.09                           | 2.9                                      |
| $\alpha\beta\alpha\gamma_{Y135A}$                                                            | 27.8±1.1/33.2±4.2                                   | 2.28±0.23/2.16±0.12                           | 1.1                                      |
| $\alpha\beta\alpha\gamma_{R272A}$                                                            | 27.5±0.8/34.1±3.3                                   | 2.40±0.20/2.80±0.30                           | 0.9                                      |
| <b>Heterodimer interface</b>                                                                 |                                                     |                                               |                                          |
| $\alpha\beta_{K153A}\alpha\gamma$                                                            | 9.21±0.43/18.4±2.0                                  | 3.13±0.49/1.80±0.13                           | 1.7                                      |
| $\alpha\beta\alpha\gamma_{K151A}$                                                            | 5.24±0.63/9.19±2.12                                 | 6.96±0.50/10.2±3.1                            | 0.7                                      |
| $\alpha_{K142A}\beta\alpha\gamma$                                                            | 6.53±0.44/6.84±0.45                                 | 2.50±0.35/0.76±0.03                           | 3.3                                      |
| $\alpha\beta\alpha_{K142A}\gamma$                                                            | 3.33±0.11/4.20±0.61                                 | 1.55±0.10/0.84±0.04                           | 1.8                                      |
| $\alpha_{K142A}\beta\alpha_{K142A}\gamma$                                                    | 1.92±0.40/1.48±0.22                                 | 11.42±2.01/8.50±2.50                          | 1.3                                      |
| <b>Heterodimer-heterodimer interface</b>                                                     |                                                     |                                               |                                          |
| $\alpha\beta_{E150A}\alpha\gamma$                                                            | 15.2±0.7/25.1±1.0                                   | 1.34±0.05/0.24±0.07                           | 5.6                                      |
| $\alpha\beta\alpha\gamma_{E148A}$                                                            | 13.4±0.4/14.0±1.7                                   | 1.29±0.05/0.25±0.12                           | 5.2                                      |
| $\alpha_{Q139A}\beta\alpha\gamma$                                                            | 36.1±1.9/43.4±2.3                                   | 0.52±0.04/0.35±0.04                           | 1.5                                      |
| $\alpha\beta\alpha_{Q139A}\gamma$                                                            | 33.0±1.2/36.4±0.6                                   | 0.40±0.05/0.23±0.03                           | 1.7                                      |
| $\alpha_{Q139A}\beta\alpha_{Q139A}\gamma$                                                    | 39.7±0.9/47.4±1.6                                   | 0.24±0.03/0.18±0.03                           | 1.3                                      |
| <b>Deletion of the N-terminal of the <math>\gamma</math> subunit (<math>\Delta N</math>)</b> |                                                     |                                               |                                          |
| $\alpha\gamma_{\Delta N}$                                                                    | 9.51±0.16/18.2±0.47                                 | 5.73±0.40/0.46±0.04                           | 12.5                                     |
| $\alpha\beta\alpha\gamma_{\Delta N}$                                                         | 5.50±0.21/13.0±0.56                                 | 3.85±0.43/2.02±0.09                           | 1.9                                      |

359

360 <sup>a</sup> Activation effect =  $S_{0.5,ICT}$  (no activators) /  $S_{0.5,ICT}$  (+activators).

361 The enzymatic activity and kinetic data were measured at standard conditions with varied

362 concentrations of ICT in the absence or presence of the activators (CIT and ADP).

363

Figure 4.

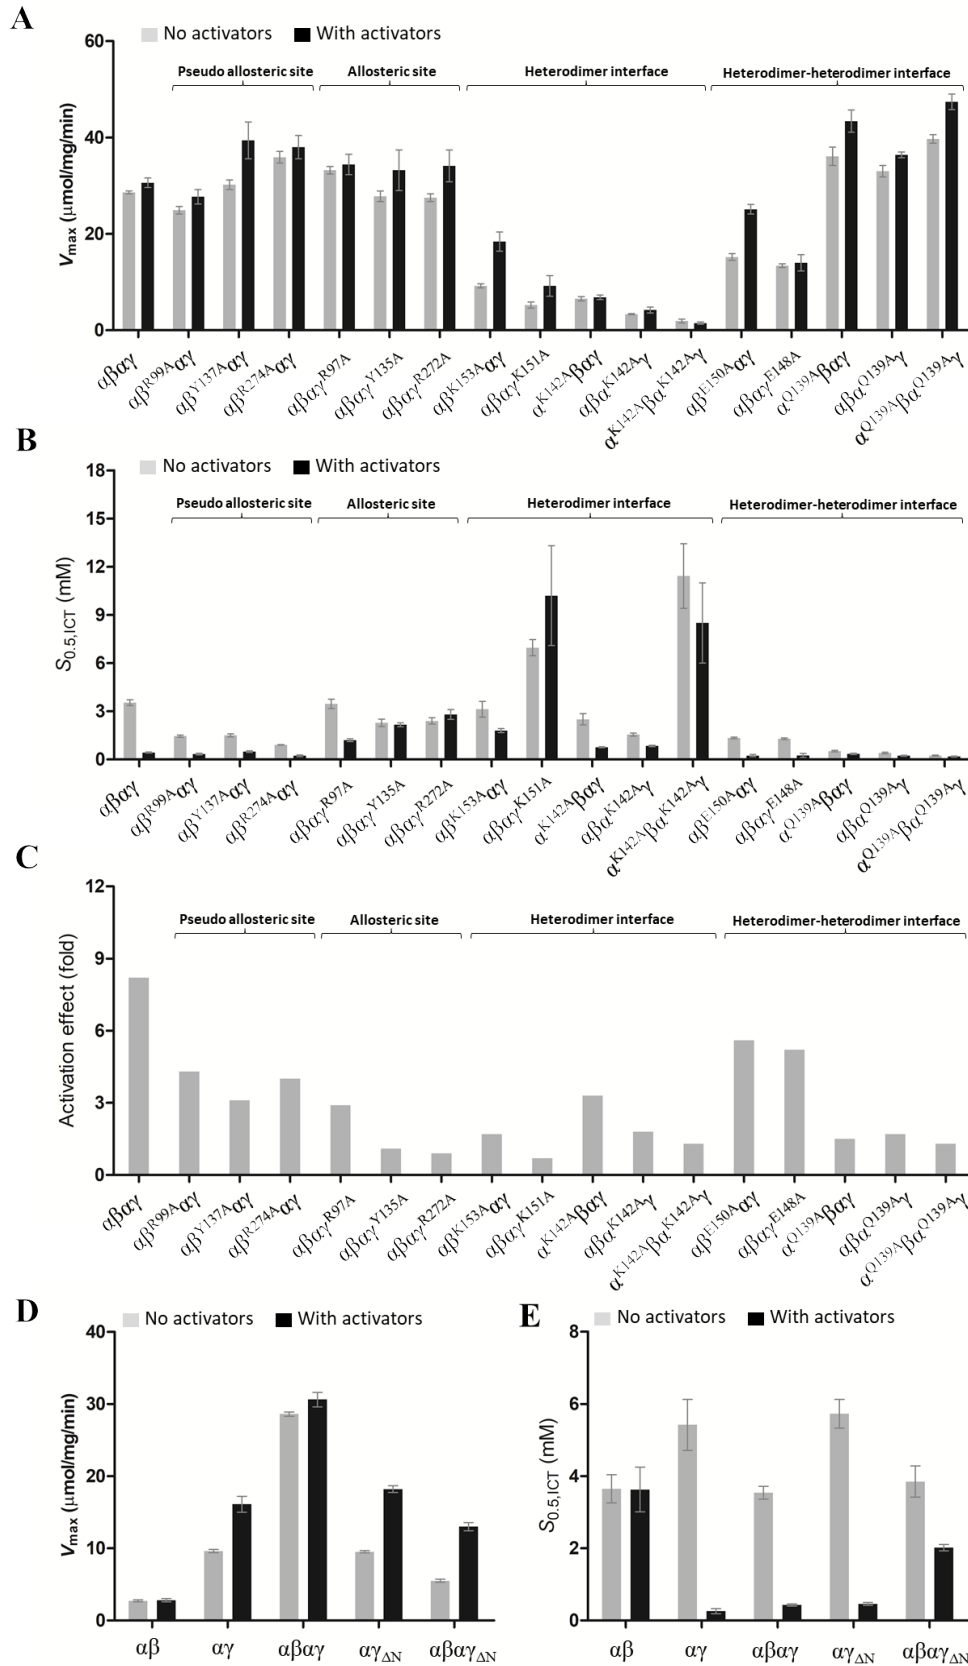

364

365

366

Figure 4. Effects of the mutations on the activity and allosteric activation of the IDH3 holoenzyme.

367 (A) Graph presentations of the  $V_{\max}$  values, (B) the  $S_{0.5,ICT}$  values, and (C) the activation effects of the  
368 wild-type holoenzyme and mutant holoenzymes containing mutations of key residues at the allosteric  
369 site, the pseudo allosteric site, the heterodimer interfaces, and the heterodimer-heterodimer interface in  
370 the absence or presence of CIT and ADP. The activation effect is defined as the ratio of the  $S_{0.5,ICT}$  in the  
371 absence and presence of the activators. The detailed kinetic parameters are listed in Table 2.

372 (D) Graph presentations of the  $V_{\max}$  values and (E) the  $S_{0.5,ICT}$  values of the wild-type  $\alpha\beta$  and  $\alpha\gamma$   
373 heterodimers and holoenzyme, and the mutant  $\alpha\gamma$  heterodimer and holoenzyme with the N-terminal of  
374 the  $\gamma$  subunit removed ( $\Delta N$ ) in the absence and presence of CIT and ADP. The detailed kinetic  
375 parameters are listed in Table 2.

376

### 377 *The N-terminus of the $\gamma$ subunit is essential for the assembly and function of the* 378 *holoenzyme*

379 In the IDH3 holoenzyme, the N-terminal region of the  $\gamma$  subunit of one heterotetramer inserts  
380 into the back cleft of the  $\beta$  subunit of the other heterotetramer to form the heterooctamer. To  
381 validate the functional role of the N-terminus of the  $\gamma$  subunit in the assembly and function of  
382 the holoenzyme, we removed the N-terminal region (residues 1-14) of the  $\gamma$  subunit ( $\gamma_{\Delta N}$ ), and  
383 prepared the mutant  $\alpha\gamma_{\Delta N}$  heterodimer and  $\alpha_2\beta\gamma_{\Delta N}$  heterotetramer. The SEC-MALS analyses  
384 show that like the wild-type  $\alpha\gamma$  heterodimer, the mutant  $\alpha\gamma_{\Delta N}$  heterodimer exists as a dimer  
385 with an average molecular weight of 84 kDa at a low concentration (2 mg/ml) and a tetramer  
386 (presumably a dimer of heterodimers) with an average molecular weight of 123 kDa at a high  
387 concentration (12 mg/ml) (Fig. S4A and Table S3). However, unlike the wild-type  
388 holoenzyme which exists as a stable octamer at both the low and high concentrations with an  
389 average molecular weight of about 284 kDa, the mutant  $\alpha_2\beta\gamma_{\Delta N}$  heterotetramer exhibits an  
390 average molecular weight of 106 kDa and thus appears to be a mixture of the  $\alpha\beta$  and  $\alpha\gamma_{\Delta N}$   
391 heterodimers and the  $\alpha_2\beta\gamma_{\Delta N}$  heterotetramer at the low concentration, and an average  
392 molecular weight of about 125 kDa and thus appears to be a heterotetramer at the high  
393 concentration (Fig. S4B and Table S3). These results indicate that deletion of the N-terminus  
394 of the  $\gamma$  subunit does not affect the formation of the  $\alpha\gamma$  heterodimer, but disrupts the formation  
395 of the heterooctamer, which are in agreement with the structural data showing that the  
396 N-terminus of the  $\gamma$  subunit is not involved in the formation of the  $\alpha\gamma$  heterodimer but is  
397 critical in the formation of the heterooctamer. The biochemical data also suggest that the  $\alpha_2\beta\gamma$   
398 heterotetramer appears to be unstable at low concentrations, and the formation of the  
399 heterooctamer stabilizes the formation of the  $\alpha_2\beta\gamma$  heterotetramer.

400 Consistently, the enzymatic activity assays show that the mutant  $\alpha\gamma_{\Delta N}$  heterodimer  
401 exhibits similar enzymatic properties as the wild-type  $\alpha\gamma$  heterodimer with comparable  $V_{\max}$ ,  
402  $S_{0.5}$ , and activation effect (Fig. 4D and Table 2). However, compared to the wild-type

403 holoenzyme, the mutant  $\alpha_2\beta\gamma_{\Delta N}$  holoenzyme exhibits a significantly low activity in both  
404 absence and presence of the activators and displays a very weak activation effect (1.9 folds)  
405 (**Fig. 4D and Table 2**). Specifically, the mutant  $\alpha_2\beta\gamma_{\Delta N}$  holoenzyme exhibits a  $V_{\max}$  of 5.50  
406  $\mu\text{mol}/\text{mg}/\text{min}$  and a  $S_{0.5}$  of 3.85 mM in the absence of the activators, and a  $V_{\max}$  of 13.0  
407  $\mu\text{mol}/\text{mg}/\text{min}$  and a  $S_{0.5}$  of 2.02 mM in the presence of the activators, which appear to be the  
408 averages of those of the  $\alpha\beta$  and  $\alpha\gamma$  heterodimers. This could be explained as follows: at the  
409 enzymatic assay conditions, the mutant  $\alpha_2\beta\gamma_{\Delta N}$  heterotetramer has a very low concentration  
410 and thus exists mainly as a mixture of the  $\alpha\beta$  and  $\alpha\gamma_{\Delta N}$  heterodimers. Taken together, our  
411 biochemical data demonstrate that the N-terminal of the  $\gamma$  subunit plays an important role in  
412 the assembly and function of the holoenzyme.

413

#### 414 **Discussion**

415 Human NAD-IDH or IDH3 is a key enzyme in the TCA cycle, which catalyzes the  
416 decarboxylation of isocitrate into  $\alpha$ -ketoglutarate. It exists and functions as a heterooctamer  
417 composed of the  $\alpha\beta$  and  $\alpha\gamma$  heterodimers, and is regulated allosterically and/or competitively  
418 by a number of metabolites including CIT, ADP, ATP, and NADH. Our previous biochemical  
419 studies of the  $\alpha\beta$  and  $\alpha\gamma$  heterodimers and the holoenzyme of human IDH3 showed that in the  
420 IDH3 holoenzyme, the  $\alpha$  subunits of both  $\alpha\beta$  and  $\alpha\gamma$  heterodimers have catalytic function; but  
421 only the  $\gamma$  subunit plays a regulatory role, while the  $\beta$  subunit plays solely a structural role  
422 (Ma et al., 2017b). Our detailed structural and biochemical studies of the isolated  $\alpha\gamma$  and  $\alpha\beta$   
423 heterodimers revealed the underlying molecular mechanisms (Liu et al., 2018; Ma et al.,  
424 2017a; Sun et al., 2020; Sun et al., 2019). Specifically, the  $\alpha\gamma$  heterodimer contains an  
425 allosteric site in the  $\gamma$  subunit which can bind both CIT and ADP. The binding of CIT and  
426 ADP induces conformational changes at the allosteric site, which are transmitted to the active  
427 site via the heterodimer interface. This series of conformational changes renders the active  
428 site to assume an active conformation favorable for ICT binding, leading to the decrease of  
429  $S_{0.5,ICT}$  and hence the activation of the enzyme. In contrast, the  $\alpha\beta$  heterodimer contains a  
430 pseudo allosteric site in the  $\beta$  subunit which is structurally different from the allosteric site  
431 and hence cannot bind the activators.

432 To investigate the molecular mechanism for the assembly and allosteric regulation of the  
433 IDH3 holoenzyme, in this work, we determined the crystal structure of human IDH3  
434 holoenzyme in apo form. In the holoenzyme, the  $\alpha\beta$  and  $\alpha\gamma$  heterodimers form the  $\alpha_2\beta\gamma$   
435 heterotetramer via their clasp domains, and two  $\alpha_2\beta\gamma$  heterotetramers assemble the  $(\alpha_2\beta\gamma)_2$   
436 heterooctamer through the insertion of the N-terminus of the  $\gamma$  subunit of one heterotetramer  
437 into the back cleft of the  $\beta$  subunit of the other heterotetramer. The holoenzyme has a

438 distorted tetrahedron architecture instead of an architecture with a pseudo 222 symmetry.  
439 Specifically, the two  $\beta$  and two  $\gamma$  subunits are arranged alternately to form the inner core, and  
440 the four  $\alpha$  subunits are positioned on the periphery. The functional roles of the key residues at  
441 the allosteric site, the pseudo allosteric site, the heterodimer interface, and the  
442 heterodimer-heterodimer interface, as well as the N-terminus of the  $\gamma$  subunit in the assembly  
443 and allosteric regulation of the holoenzyme are validated by mutagenesis and kinetic data.  
444 The biochemical and structural data also demonstrate that the  $\alpha_2\beta\gamma$  heterotetramer is unstable  
445 because the heterodimer-heterodimer interface is not very tight and involves mainly  
446 hydrophobic interactions. On the other hand, the  $(\alpha_2\beta\gamma)_2$  heterooctamer is very stable as the  
447 two  $\alpha_2\beta\gamma$  heterotetramers interact with each other via two large interfaces to form a ring-like  
448 architecture, and the interfaces involve both hydrophilic and hydrophobic interactions. The  
449 formation of the  $(\alpha_2\beta\gamma)_2$  heterooctamer stabilizes the formation of the  $\alpha_2\beta\gamma$  heterotetramer in  
450 the holoenzyme. These findings reveal the molecular mechanism for the assembly of the  
451 heterotetramer and heterooctamer of human IDH3.

452 Structural comparison shows that in the holoenzyme, the  $\alpha\gamma$  heterodimer assumes very  
453 similar overall conformation as the isolated  $\alpha^{\text{Mg}}\gamma$  heterodimer, and the allosteric site assumes  
454 a proper conformation to bind the activators. However, the  $\alpha\beta$  heterodimer exhibits some  
455 conformational changes from the isolated  $\alpha^{\text{Ca}}\beta$  heterodimer. The formation of the  $(\alpha_2\beta\gamma)_2$   
456 heterooctamer renders the  $\alpha\beta$  heterodimer to adopt an overall conformation similar to that of  
457 the  $\alpha^{\text{Mg}}\gamma$  heterodimer rather than the compact conformation of the  $\alpha^{\text{Ca}}\beta$  heterodimer.  
458 Nevertheless, the pseudo allosteric site is still unable to bind the activators. Hence, the  $\alpha$   
459 subunit of the  $\alpha\beta$  heterodimer in the holoenzyme can be allosterically activated and has  
460 normal catalytic function but the  $\beta$  subunit still has no regulatory function. These results also  
461 demonstrate that the structure characteristics and the regulatory mechanisms of the  $\alpha\beta$  and  $\alpha\gamma$   
462 heterodimers uncovered from the structure and biochemical studies of the isolated  $\alpha\beta$  and  $\alpha\gamma$   
463 heterodimers are largely applicable to the holoenzyme.

464 Our biochemical and structural data show that the IDH3 holoenzyme exists as a stable  
465 heterooctamer in both solution and structure, and functions as a heterooctamer as well. The  
466 wild-type holoenzyme exhibits a notably higher activity than the sum of the activities of the  
467  $\alpha\beta$  and  $\alpha\gamma$  heterodimers in both the absence and presence of activators, and that the mutant  
468 holoenzyme containing the  $\alpha_{\text{Y126A}}$  mutation at the active site in either the  $\alpha\beta$  or  $\alpha\gamma$   
469 heterodimer exhibits about 50% of the activity of the wild-type holoenzyme and displays a  
470 significant activation effect; however, the mutant holoenzyme containing the  $\alpha_{\text{Y126A}}$  mutation  
471 in both  $\alpha\beta$  and  $\alpha\gamma$  heterodimers completely abolishes the activity (Ma et al., 2017b). These  
472 results indicate that in the holoenzyme, both  $\alpha\beta$  or  $\alpha\gamma$  heterodimer have catalytic function and

473 can be activated by the activators, and the binding of the activators to the allosteric site in the  
474  $\gamma$  subunit can allosterically regulate the  $\alpha$  subunit in both heterodimers. The structure of the  
475 IDH3 holoenzyme shows that the allosteric site in the  $\gamma$  subunit could bind the activators but  
476 the pseudo allosteric site in the  $\beta$  subunit remains incapable of binding the activators, and that  
477 the overall conformation and the active-site conformation in both  $\alpha\beta$  and  $\alpha\gamma$  heterodimers are  
478 suitable for allosteric activation and catalytic function. Consistently, the biochemical data  
479 show that the mutations at the allosteric site have significant impacts on the activation and  
480 function of the holoenzyme, whereas the mutations at the pseudo allosteric site have  
481 insignificant impacts on the activation and function of the holoenzyme, indicating that the  
482 allosteric site plays a critical role and the pseudo allosteric site has no regulatory role in the  
483 allosteric activation of the holoenzyme. In addition, the mutations at the heterodimer  
484 interfaces have severe impacts on the activation and function of the holoenzyme, indicating  
485 that the heterodimer interfaces play a vital role in the communication from the allosteric site  
486 to the active sites of both  $\alpha$  subunits. Furthermore, while the  $\beta_{E150A}$  and  $\gamma_{E148A}$  mutations at the  
487 heterodimer-heterodimer interface have minor impacts on the activation and function of the  
488 holoenzyme; the  $\alpha_{Q139A}$  mutation in either or both the  $\alpha\beta$  and  $\alpha\gamma$  heterodimers renders the  
489 mutant holoenzyme constitutively active in both the absence and presence of the activators,  
490 indicating that the heterodimer-heterodimer interface plays an important role in the assembly  
491 and allosteric regulation of the  $\alpha_2\beta\gamma$  heterotetramer and the holoenzyme. Taken together, the  
492 structural and biochemical data suggest that upon the binding of the activators to the allosteric  
493 site, the activation signal is transmitted from the allosteric site to the  $\alpha$  subunits of both  $\alpha\beta$   
494 and  $\alpha\gamma$  heterodimers through the heterodimer and heterodimer-heterodimer interfaces, leading  
495 to the activation of both heterodimers in the  $\alpha_2\beta\gamma$  heterotetramer and the holoenzyme. These  
496 findings reveal the molecular mechanism for the allosteric regulation of the IDH3  
497 holoenzyme.

498 All eukaryotes contain NAD-IDHs to carry out the catalytic function in the TCA cycle.  
499 However, the composition of NAD-IDHs differs from low eukaryotes to high eukaryotes. In  
500 low eukaryotes such as *Saccharomyces cerevisiae* and most single cell eukaryotes, the  
501 NAD-IDH is composed of two types of subunits (IDH1 and IDH2) in 1:1 ratio. IDH1 and  
502 IDH2 form the IDH1/IDH2 heterodimer which assembles the heterotetramer and further the  
503 heterooctamer. In high eukaryotes such as mammals, the NAD-IDH is composed of three  
504 types of subunits ( $\alpha$ ,  $\beta$  and  $\gamma$ ) in 2:1:1 ratio. The  $\alpha$ ,  $\beta$  and  $\gamma$  subunits form two types of  
505 heterodimers ( $\alpha\beta$  and  $\alpha\gamma$ ) which assemble the  $\alpha_2\beta\gamma$  heterotetramer and further the  $(\alpha_2\beta\gamma)_2$   
506 heterooctamer. In either cases, the NAD-IDHs always exist and function as the heterooctamer.

507 Previous biochemical and structural studies showed that in yeast NAD-IDH, IDH2 is the  
508 catalytic subunit which contains the active site, and IDH1 is the regulatory subunit which



509 contains the allosteric site (Cupp and McAlisterhenn, 1993; Lin and McAlister-Henn, 2002,  
510 2003). The heterooctamer of yeast NAD-IDH exhibits an asymmetric architecture, in which  
511 the regulatory IDH1 subunits form the inner core and the catalytic IDH2 subunits are  
512 positioned on the outside surface, and thus the four IDH1 subunits are in two different  
513 structural environments with different conformations (Taylor et al., 2008).

514 Although early biochemical studies of mammalian NAD-IDHs showed that the  $\alpha$  subunit  
515 is the catalytic subunit and the  $\beta$  and  $\gamma$  subunits are the regulatory subunits, our biochemical  
516 and structural studies of human NAD-IDH or IDH3 clearly demonstrated that the  $\alpha$  subunits  
517 of both  $\alpha\beta$  and  $\alpha\gamma$  heterodimers have the catalytic function, the  $\gamma$  subunit plays the regulatory  
518 role, whereas the  $\beta$  subunit plays no regulatory role albeit it is required for the function of the  
519 holoenzyme (Ma et al., 2017b; Sun et al., 2019). Interestingly, the heterooctamer of human  
520 NAD-IDH also exhibits an asymmetric architecture, in which the two  $\beta$  subunits and two  $\gamma$   
521 subunits are arranged alternately to form the inner core and the four  $\alpha$  subunits are positioned  
522 on the outer surface, and the two  $\beta$  subunits are in different structural environments with  
523 different conformations from the two  $\gamma$  subunits. Structural comparison shows that the  
524 heterooctamers of yeast and human NAD-IDHs exhibit almost identical architecture and  
525 could be superimposed very well. These results suggest that like human NAD-IDH, only two  
526 of the four IDH1 subunits in yeast NAD-IDH have allosteric regulatory function and the other  
527 two have no regulatory function. This explains the biochemical data that there are only two  
528 AMP-binding sites in yeast NAD-IDH holoenzyme, and provides the support evidence for the  
529 speculation that the binding of AMP to all four IDH1 subunits is an artifact of excess AMP in  
530 the crystallization solution (Cupp and McAlisterhenn, 1993; Lin and McAlister-Henn, 2002,  
531 2003; McAlister-Henn, 2012; Taylor et al., 2008; Zhao and McAlister-Henn, 1997). These  
532 findings also suggest that all eukaryotic NAD-IDHs would assume a similar asymmetric  
533 architecture and employ a similar allosteric regulation mechanism.

534

535 **Materials and methods**

536 **Cloning, expression and purification**

537 The  $\alpha\beta$  and  $\alpha\gamma$  heterodimers and the holoenzyme of human IDH3 were prepared as described  
538 previously (Ma et al., 2017b). Briefly, the DNA fragments encoding the  $\alpha$ ,  $\beta$  and  $\gamma$  subunits of  
539 human IDH3 were cloned into the co-expression vector pQlinkN with the C-terminals of the  $\beta$   
540 and  $\gamma$  subunits attached with a TEV protease cleavage site and a His<sub>6</sub> tag to construct the  
541 pQlinkN- $\alpha$ - $\beta$ -tev-His<sub>6</sub> and pQlinkN- $\alpha$ - $\gamma$ -tev-His<sub>6</sub> plasmids. The plasmids were transformed  
542 into *E. coli* BL21 (DE3) Codon-Plus strain (Novagen). When the culture of the transformed  
543 cells reached an OD<sub>600</sub> of 0.5, the protein expression was induced by 0.4 mM IPTG for 20 hrs  
544 at 24 °C. The bacterial cells were harvested and then sonicated on ice in the lysis buffer (50  
545 mM HEPES, pH 7.4, 200 mM NaCl, 0.2 mM MnCl<sub>2</sub>, 10% glycerol, and 7.2 mM  $\beta$ -ME)  
546 supplemented with 1 mM PMSF. The target proteins were purified by affinity  
547 chromatography using a Ni-NTA column (Qiagen) with the lysis buffer supplemented with 20  
548 mM and 200 mM imidazole serving as the washing buffer and elution buffer, respectively.  
549 The elution fraction was dialyzed overnight against the lysis buffer supplemented with TEV  
550 protease to cleave the His<sub>6</sub>-tag of the target protein. The cleavage mixture was reloaded on a  
551 Ni-NTA column and washed with the lysis buffer supplemented with 10 mM imidazole. The  
552 flow-through fraction containing the target protein was further purified by gel filtration using  
553 a Superdex 200 10/60 GL column (GE Healthcare) equilibrated with the storage buffer (10  
554 mM HEPES, pH 7.4, 200 mM NaCl, and 5 mM  $\beta$ -ME). The holoenzyme was prepared by  
555 co-purifying the separately expressed  $\alpha\beta$  and  $\alpha\gamma$  heterodimers using the same methods as for  
556 the  $\alpha\beta$  and  $\alpha\gamma$  heterodimers. Purity of the proteins was analyzed by 12% SDS-PAGE with  
557 Coomassie blue staining. Mutants of the  $\alpha\beta$  and  $\alpha\gamma$  heterodimers and the holoenzyme  
558 containing point mutations were constructed using the QuikChange® Site-Directed  
559 Mutagenesis kit (Stratagene). Expression and purification of the mutants were carried out  
560 using the same methods as for the wild-type proteins.

561

562 **SEC-MALS analysis**

563 The purity, molecular mass, and size distribution of the proteins were analyzed by an  
564 analytical light scattering instrument (SEC-MALS) consisting of an Agilent 1260 Infinity  
565 Isocratic Liquid Chromatography System, a Wyatt Dawn Heleos II Multi-Angle Light  
566 Scattering Detector, and a Wyatt Optilab T-rEX Refractive Index Detector (Wyatt  
567 Technology). Analytical size exclusion chromatography was performed at 24 °C using a  
568 Superdex 200 10/300 GL column (GE Healthcare) equilibrated with a mobile phase  
569 containing 10 mM HEPES (pH 7.4), 200 mM NaCl, and 5 mM  $\beta$ -ME. 100  $\mu$ l protein solution  
570 was injected into the column and eluted at a flow rate of 0.4 ml/min. The column effluent was

571 monitored simultaneously with three detectors for UV absorption, light scattering and  
572 refractive index. The data were analyzed using the ASTRA software (Wyatt Technology) to  
573 determine the molecular mass of the protein (Folta-Stogniew, 2006).

574

#### 575 **Crystallization, diffraction data collection and structure determination**

576 Crystallization was performed using the hanging drop vapor diffusion method at 20 °C by  
577 mixing equal volume of protein solution (10 mg/ml) and reservoir solution. Crystals of the  
578 IDH3 holoenzyme grew in drops containing the reservoir solution of 0.05 M NH<sub>4</sub>Cl, 0.05  
579 Bis-Tris (pH 6.5), and 30% pentaerythritol ethoxylate. Crystals were cryoprotected using the  
580 reservoir solution supplemented with 25% ethylene glycol. Diffraction data were collected at  
581 100 K at BL17U1 of Shanghai Synchrotron Radiation Facility and processed with HKL3000  
582 (Otwinowski Z., 1997). Statistics of the diffraction data are summarized in **Table 1**.

583 The structure of the IDH3 holoenzyme was solved with the molecular replacement  
584 method implemented in program Phaser (McCoy et al., 2007) using the structures of the  $\alpha\gamma$   
585 heterodimer (PDB code 6KDE) and the  $\alpha\beta$  heterodimer (PDB code 5GRH) as the search  
586 models. Structure refinement was carried out with program Phenix and REFMAC5 (Adams et  
587 al., 2010; Murshudov et al., 1997). Model building was performed with program Coot  
588 (Emsley and Cowtan, 2004). Stereochemistry and quality of the structure model were  
589 analyzed using programs in the CCP4 suite (Winn et al., 2011). Structure figures were  
590 prepared using PyMol (Schrodinger, 2010). Statistics of the structure refinement and the final  
591 structure model are also summarized in **Table 1**.

592

#### 593 **Enzymatic activity assay**

594 The enzymatic activities of the wild-type and mutant  $\alpha\beta$  and  $\alpha\gamma$  heterodimers and  
595 holoenzymes of human IDH3 were determined using the method as described previously (Ma  
596 et al., 2017b). The standard reaction solution (1 ml) consisted of 2 ng/ml enzyme, 33 mM  
597 Tris-acetate (pH 7.4), 40 mM ICT, 2 mM Mn<sup>2+</sup>, and 3.2 mM NAD. The activity is defined as  
598 the moles of NADH produced per min per milligram of enzyme (mol/min/mg). The kinetic  
599 data in the absence of the activators (CIT and ADP) were measured with varied  
600 concentrations of ICT (0-40 mM), Mn<sup>2+</sup> (0-10 mM), or NAD (0-10 mM) to obtain the V<sub>max</sub>  
601 and S<sub>0.5</sub> for ICT, Mn<sup>2+</sup>, or NAD, respectively. The kinetic data in the presence of the activators  
602 were measured at the same conditions supplemented with 1 mM CIT and 1 mM ADP. The  
603 kinetic parameters were obtained by fitting the kinetic data into the non-Michaelis-Menten  
604 equation “ $V=V_{max}*[S]^h/(S_{0.5}^h+[S]^h)$ ” using program Graphpad Prism (Graphpad  
605 Software). All experiments were performed twice and the values were the averages of the  
606 measurements with the standard errors.

607 **Protein Data Bank accession code**

608 The crystal structure of human IDH3 holoenzyme has been deposited in the Protein Data  
609 Bank with accession code 7CE3.

610

611 **Conflict of interest statement**

612 The authors declare no conflict of interests.

613

614 **Acknowledgements**

615 We thank the staff members at BL17U1 of Shanghai Synchrotron Radiation Facility (SSRF)  
616 and the Large-scale Protein Preparation System at the National Facility for Protein Science in  
617 Shanghai (NFPS), Zhangjiang Lab, China for providing technical support and assistance in  
618 data collection and analysis, and other members of our group for valuable discussion. This  
619 work was supported by grants from the National Natural Science Foundation of China  
620 (31870723 and 31530013) and the CAS Facility-based Open Research Program.

621

622 **Authorship contributions**

623 PS carried out the biochemical and structural studies, and participated in the data analyses.

624 TM participated in the initial biochemical and structural studies. JD conceived the study,  
625 participated in the experimental design and data analyses, and wrote the manuscript.

626

627 **References**

- 628 Adams, P.D., Afonine, P.V., Bunkoczi, G., Chen, V.B., Davis, I.W., Echols, N., Headd, J.J.,  
629 Hung, L.W., Kapral, G.J., Grosse-Kunstleve, R.W., McCoy, A.J., Moriarty, N.W., Oeffner,  
630 R., Read, R.J., Richardson, D.C., Richardson, J. S., Terwilliger, T. C., Zwart, P. H. (2010).  
631 PHENIX: a comprehensive Python-based system for macromolecular structure solution.  
632 *Acta Crystallogr. D Biol. Crystallogr.* *66*, 213-221. DOI:  
633 <https://doi.org/10.1107/S0907444909052925>
- 634 Al-Khallaf, H. (2017). Isocitrate dehydrogenases in physiology and cancer: biochemical and  
635 molecular insight. *Cell Biosci.* *7*, 37. DOI: <https://doi.org/10.1186/s13578-017-0165-3>
- 636 Cohen, P.F., and Colman, R.F. (1972). Diphosphopyridine nucleotide dependent isocitrate  
637 dehydrogenase from pig heart. Characterization of the active substrate and modes of  
638 regulation. *Biochemistry* *11*, 1501-1508. DOI: <https://doi.org/10.1021/bi00758a027>
- 639 Cupp, J.R., and Mcalisterhenn, L. (1993). Kinetic-analysis of NAD<sup>+</sup>-isocitrate dehydrogenase  
640 with altered isocitrate binding-sites-contribution of Idh1 and Idh2 subunits to regulation  
641 and catalysis. *Biochemistry* *32*, 9323-9328. DOI: <https://doi.org/10.1021/bi00087a010>
- 642 Dang, L., White, D.W., Gross, S., Bennett, B.D., Bittinger, M.A., Driggers, E.M., Fantin, V.R.,  
643 Jang, H.G., Jin, S., Keenan, M.C., Marks, K. M., Prins, R. M., Ward, P. S., Yen, K. E., Liao,  
644 L. M., Rabinowitz, J. D., Cantley, L. C., Thompson, C. B., Heiden, M. G. V., Su, S. M.  
645 (2009). Cancer-associated IDH1 mutations produce 2-hydroxyglutarate. *Nature* *462*,  
646 739-U752. DOI: <https://doi.org/10.1038/nature08617>
- 647 Ehrlich, R.S., and Colman, R. (1983). Separation, recombination, and characterization of  
648 dissimilar subunits of the DPN-dependent isocitrate dehydrogenase from pig heart. *J. Biol.*  
649 *Chem.* *258*, 7079-7086.
- 650 Ehrlich, R.S., and Colman, R.F. (1981). Binding of ligands to half of subunits of  
651 NAD-dependent isocitrate dehydrogenase from pig-heart-binding of manganous ion,  
652 isocitrate, ADP and NAD. *J. Biol. Chem.* *256*, 1276-1282.
- 653 Ehrlich, R.S., Hayman, S., Ramachandran, N., and Colman, R. (1981). Re-evaluation of  
654 molecular weight of pig heart NAD-specific isocitrate dehydrogenase. *J. Biol. Chem.* *256*,  
655 10560-10564.
- 656 Emsley, P., and Cowtan, K. (2004). Coot: model-building tools for molecular graphics. *Acta*  
657 *Crystallogr. D Biol. Crystallogr.* *60*, 2126-2132. DOI:  
658 <https://doi.org/10.1107/S0907444904019158>
- 659 Folta-Stogniew, E. (2006). Oligomeric states of proteins determined by size-exclusion  
660 chromatography coupled with light scattering, absorbance, and refractive index detectors.  
661 *Methods Mol. Biol.* *328*, 97-112. DOI: <https://doi.org/10.1385/1-59745-026-X:97>
- 662 Gabriel, J., and Plaut, G. (1984a). Citrate activation of NAD-specific isocitrate dehydrogenase  
663 from bovine heart. *J. Biol. Chem.* *259*, 1622-1628.
- 664 Gabriel, J.L., Milner, R., and Plaut, G.W. (1985). Inhibition and activation of bovine heart  
665 NAD-specific isocitrate dehydrogenase by ATP. *Arch. Biochem. Biophys.* *240*, 128-134.  
666 DOI: [https://doi.org/10.1016/0003-9861\(85\)90015-3](https://doi.org/10.1016/0003-9861(85)90015-3)
- 667 Gabriel, J.L., and Plaut, G.W. (1984b). Inhibition of bovine heart NAD-specific isocitrate  
668 dehydrogenase by reduced pyridine nucleotides: modulation of inhibition by ADP, NAD<sup>+</sup>,  
669 Ca<sup>2+</sup>, citrate, and isocitrate. *Biochemistry* *23*, 2773-2778. DOI:  
670 <https://doi.org/10.1021/bi00307a037>
- 671 Hartong, D.T., Dange, M., McGee, T.L., Berson, E.L., Dryja, T.P., and Colman, R.F. (2008).  
672 Insights from retinitis pigmentosa into the roles of isocitrate dehydrogenases in the Krebs  
673 cycle. *Nat Genet.* *40*, 1230-1234. DOI: <https://doi.org/10.1038/ng.223>
- 674 Hurley, J.H., Dean, A.M., Koshland, D.E., Jr., and Stroud, R.M. (1991). Catalytic mechanism  
675 of NADP<sup>+</sup>-dependent isocitrate dehydrogenase: implications from the structures of  
676 magnesium-isocitrate and NADP<sup>+</sup> complexes. *Biochemistry* *30*, 8671-8678. DOI:  
677 <https://doi.org/10.1021/bi00099a026>
- 678 Jo, S.H., Son, M.K., Koh, H.J., Lee, S.M., Song, I.H., Kim, Y.O., Lee, Y.S., Jeong, K.S., Kim,  
679 W.B., Park, J.W., Song, B. J., Huh, T. L. (2001). Control of mitochondrial redox balance  
680 and cellular defense against oxidative damage by mitochondrial NADP<sup>+</sup>-dependent

681 isocitrate dehydrogenase. *J. Biol. Chem.* 276, 16168-16176. DOI:  
682 <https://doi.org/10.1074/jbc.M010120200>

683 Kiefmann, M., Tank, S., Keller, P., Bornchen, C., Rinnenthal, J.L., Tritt, M.O.,  
684 Schulte-Uentrop, L., Olotu, C., Goetz, A.E., and Kiefmann, R. (2017). IDH3 mediates  
685 apoptosis of alveolar epithelial cells type 2 due to mitochondrial  $\text{Ca}^{2+}$  uptake during  
686 hypocapnia. *Cell Death Dis.* 8, e3005. DOI: <https://doi.org/10.1038/cddis.2017.403>

687 Kim, S.Y., and Park, J.W. (2003). Cellular defense against singlet oxygen-induced oxidative  
688 damage by cytosolic  $\text{NADP}^+$ -dependent isocitrate dehydrogenase. *Free Radic. Res.* 37,  
689 309-316. DOI: <https://doi.org/10.1080/1071576021000050429>

690 Koh, H.J., Lee, S.M., Son, B.G., Lee, S.H., Ryoo, Z.Y., Chang, K.T., Park, J.W., Park, D.C.,  
691 Song, B.J., Veech, R.L., Song, H., Huh, T. L. (2004). Cytosolic  $\text{NADP}^+$ -dependent  
692 isocitrate dehydrogenase plays a key role in lipid metabolism. *J. Biol. Chem.* 279,  
693 39968-39974. DOI: <https://doi.org/10.1074/jbc.M402260200>

694 Lee, S.M., Koh, H.J., Park, D.C., Song, B.J., Huh, T.L., and Park, J.W. (2002). Cytosolic  
695  $\text{NADP}^+$ -dependent isocitrate dehydrogenase status modulates oxidative damage to cells.  
696 *Free Radic. Biol. Med.* 32, 1185-1196. DOI:  
697 [https://doi.org/10.1016/s0891-5849\(02\)00815-8](https://doi.org/10.1016/s0891-5849(02)00815-8)

698 Lin, A.P., Demeler, B., Minard, K.I., Anderson, S.L., Schirf, V., Galaleldeen, A., and  
699 McAlister-Henn, L. (2011). Construction and analyses of tetrameric forms of yeast  
700  $\text{NAD}^+$ -specific isocitrate dehydrogenase. *Biochemistry* 50, 230-239. DOI:  
701 <https://doi.org/10.1021/bi101401h>

702 Lin, A.P., and McAlister-Henn, L. (2002). Isocitrate binding at two functionally distinct sites  
703 in yeast  $\text{NAD}^+$ -specific isocitrate dehydrogenase. *J. Biol. Chem.* 277, 22475-22483. DOI:  
704 <https://doi.org/10.1074/jbc.M202534200>

705 Lin, A.P., and McAlister-Henn, L. (2003). Homologous binding sites in yeast isocitrate  
706 dehydrogenase for cofactor ( $\text{NAD}^+$ ) and allosteric activator (AMP). *J. Biol. Chem.* 278,  
707 12864-12872. DOI: <https://doi.org/10.1074/jbc.M300154200>

708 Liu, Y., Hu, L., Ma, T., Yang, J., and Ding, J. (2018). Insights into the inhibitory mechanisms  
709 of  $\text{NADH}$  on the  $\alpha\gamma$  heterodimer of human  $\text{NAD}$ -dependent isocitrate dehydrogenase. *Sci.*  
710 *Rep.* 8, 3146. DOI: <https://doi.org/10.1038/s41598-018-21584-7>

711 Ma, T., Peng, Y., Huang, W., and Ding, J. (2017a). Molecular mechanism of the allosteric  
712 regulation of the  $\alpha\gamma$  heterodimer of human  $\text{NAD}$ -dependent isocitrate dehydrogenase. *Sci.*  
713 *Rep.* 7, 40921. DOI: <https://doi.org/10.1038/srep40921>

714 Ma, T., Peng, Y., Huang, W., Liu, Y., and Ding, J. (2017b). The  $\beta$  and  $\gamma$  subunits play distinct  
715 functional roles in the  $\alpha_2\beta\gamma$  heterotetramer of human  $\text{NAD}$ -dependent isocitrate  
716 dehydrogenase. *Sci. Rep.* 7, 41882. DOI: <https://doi.org/10.1038/srep41882>

717 May, J.L., Kouri, F.M., Hurley, L.A., Liu, J., Tommasini-Ghelfi, S., Ji, Y.R., Gao, P., Calvert,  
718 A.E., Lee, A., Chandel, N.S., Davuluri, R. V., Horbinski, C. M., Locasale, J. W., Stegh, A.  
719 H. (2019). IDH3  $\alpha$  regulates one-carbon metabolism in glioblastoma. *Sci. Adv.* 5. DOI:  
720 <https://doi.org/10.1126/sciadv.aat0456>

721 McAlister-Henn, L. (2012). Ligand binding and structural changes associated with allostery in  
722 yeast  $\text{NAD}^+$ -specific isocitrate dehydrogenase. *Arch. Biochem. Biophys.* 519, 112-117.  
723 DOI: <https://doi.org/10.1016/j.abb.2011.10.003>

724 McCoy, A.J., Grosse-Kunstleve, R.W., Adams, P.D., Winn, M.D., Storoni, L.C., and Read, R.J.  
725 (2007). Phaser crystallographic software. *J. Appl. Crystallogr.* 40, 658-674. DOI:  
726 <https://doi.org/10.1107/S0021889807021206>

727 Murshudov, G.N., Vagin, A.A., and Dodson, E.J. (1997). Refinement of macromolecular  
728 structures by the maximum-likelihood method. *Acta Crystallogr. D Biol. Crystallogr.* 53,  
729 240-255. DOI: <https://doi.org/10.1107/S0907444996012255>

730 Nichols, B.J., Hall, L., Perry, A.C., and Denton, R.M. (1993). Molecular cloning and deduced  
731 amino acid sequences of the  $\gamma$  subunits of rat and monkey  $\text{NAD}^+$ -isocitrate dehydrogenases.  
732 *Biochem. J.* 295, 347-350.

733 Nichols, B.J., Perry, A.C., Hall, L., and Denton, R.M. (1995). Molecular cloning and deduced  
734 amino acid sequences of the  $\alpha$  and  $\beta$  subunits of mammalian  $\text{NAD}^+$ -isocitrate

735 dehydrogenase. *Biochem. J.* *310*, 917-922.

736 Otwinowski Z., M.W. (1997). Processing of X-ray diffraction data collected in oscillation  
737 mode. *Methods in Enzymol.* *276*, 307-326.

738 Pavlova, N.N., and Thompson, C.B. (2016). The emerging hallmarks of cancer metabolism.  
739 *Cell Metab.* *23*, 27-47. DOI: <https://doi.org/10.1016/j.cmet.2015.12.006>

740 Schrodinger, LLC (2010). The PyMOL molecular graphics system, Version 1.3r1.

741 Sun, P., Bai, T., Ma, T., and Ding, J. (2020). Molecular mechanism of the dual regulatory roles  
742 of ATP on the  $\alpha\gamma$  heterodimer of human NAD-dependent isocitrate dehydrogenase. *Sci.*  
743 *Rep.* *10*, 6225-6225. DOI: <https://doi.org/10.1038/s41598-020-63425-6>

744 Sun, P., Ma, T., Zhang, T., Zhu, H., Zhang, J., Liu, Y., and Ding, J. (2019). Molecular basis for  
745 the function of the  $\alpha\beta$  heterodimer of human NAD-dependent isocitrate dehydrogenase. *J.*  
746 *Biol. Chem.* *294*, 16214-16227. DOI: <https://doi.org/10.1074/jbc.RA119.010099>

747 Taylor, A.B., Hu, G., Hart, P.J., and McAlister-Henn, L. (2008). Allosteric motions in  
748 structures of yeast NAD<sup>+</sup>-specific isocitrate dehydrogenase. *J. Biol. Chem.* *283*,  
749 10872-10880. DOI: <https://doi.org/10.1074/jbc.M708719200>

750 Waitkus, M.S., Diplas, B.H., and Yan, H. (2016). Isocitrate dehydrogenase mutations in  
751 gliomas. *Neuro Oncol.* *18*, 16-26. DOI: <https://doi.org/10.1093/neuonc/nov136>

752 Winn, M.D., Ballard, C.C., Cowtan, K.D., Dodson, E.J., Emsley, P., Evans, P.R., Keegan,  
753 R.M., Krissinel, E.B., Leslie, A.G., McCoy, A., McNicholas, S. J., Murshudov, G. N.,  
754 Pannu, N. S., Potterton, E. A., Powell, H. R., Read, R. J., Vagin, A., Wilson, K. S. (2011).  
755 Overview of the CCP4 suite and current developments. *Acta Crystallogr. D Biol.*  
756 *Crystallogr.* *67*, 235-242. DOI: <https://doi.org/10.1107/S0907444910045749>

757 Xu, X., Zhao, J., Xu, Z., Peng, B., Huang, Q., Arnold, E., and Ding, J. (2004). Structures of  
758 human cytosolic NADP-dependent isocitrate dehydrogenase reveal a novel self-regulatory  
759 mechanism of activity. *J. Biol. Chem.* *279*, 33946-33957. DOI:  
760 <https://doi.org/10.1074/jbc.M404298200>

761 Yan, H., Parsons, D.W., Jin, G., McLendon, R., Rasheed, B.A., Yuan, W., Kos, I.,  
762 Batinic-Haberle, I., Jones, S., Riggins, G.J., Friedman, H., Friedman, A., Reardon, D.,  
763 Herndon, J., Kinzler, K. W., Velculescu, V. E., Vogelstein, B., Bigner, D. D. (2009). IDH1  
764 and IDH2 mutations in gliomas. *N. Engl. J. Med.* *360*, 765-773. DOI:  
765 <https://doi.org/10.1056/NEJMoa0808710>

766 Yang, B., Zhong, C., Peng, Y., Lai, Z., and Ding, J. (2010). Molecular mechanisms of "off-on  
767 switch" of activities of human IDH1 by tumor-associated mutation R132H. *Cell Res.* *20*,  
768 1188-1200. DOI: <https://doi.org/10.1038/cr.2010.145>

769 Yoshimi, N., Futamura, T., Bergen, S.E., Iwayama, Y., Ishima, T., Sellgren, C., Ekman, C.J.,  
770 Jakobsson, J., Palsson, E., Kakumoto, K., Ohgi, Y., Yoshikawa, T., Lande 'n, M.,  
771 Hashimoto, K. (2016). Cerebrospinal fluid metabolomics identifies a key role of isocitrate  
772 dehydrogenase in bipolar disorder: evidence in support of mitochondrial dysfunction  
773 hypothesis. *Mol. Psychiatry* *21*, 1504-1510. DOI: <https://doi.org/10.1038/mp.2015.217>

774 Zhang, D.X., Wang, Y.B., Shi, Z.M., Liu, J.Y., Sun, P., Hou, X.D., Zhang, J., Zhao, S.M.,  
775 Zhou, B.H.P., and Mi, J. (2015). Metabolic reprogramming of cancer-associated fibroblasts  
776 by IDH3  $\alpha$  downregulation. *Cell Rep.* *10*, 1335-1348. DOI:  
777 <https://doi.org/10.1016/j.celrep.2015.02.006>

778 Zhao, W.N., and McAlister-Henn, L. (1997). Affinity purification and kinetic analysis of  
779 mutant forms of yeast NAD<sup>+</sup>-specific isocitrate dehydrogenase. *J. Biol. Chem.* *272*,  
780 21811-21817.

781 Zheng, J., and Jia, Z. (2010). Structure of the bifunctional isocitrate dehydrogenase  
782 kinase/phosphatase. *Nature* *465*, 961-965. DOI: <https://doi.org/10.1038/nature09088>

783 Zheng, J., Yates, S.P., and Jia, Z. (2012). Structural and mechanistic insights into the  
784 bifunctional enzyme isocitrate dehydrogenase kinase/phosphatase AceK. *Philos. Trans. R*  
785 *Soc. Lond. B Biol. Sci.* *367*, 2656-2668. DOI: <https://doi.org/10.1098/rstb.2011.0426>

786
